# Supplementary material for: Design and production of environmentally degradable quaternary ammonium salts
Source: Royal Society of Chemistry journal article supplement (doi:10.1039/d1gc01525g), 2021-01-01
Supplement: d1gc01525g1.pdf [file d1gc01525g1.pdf]

**Supporting information**  
**Design and Production of Environmentally Degradable Quaternary Ammonium Salt**

**Xiaolong Zhang,<sup>a,‡</sup> Hongtao Kong,<sup>a,b,‡</sup> Xuepeng Zhang,<sup>a</sup> Hengmin Jia,<sup>c</sup> Xiuxia**

**Ma,<sup>a,b</sup> Hui, Miao,<sup>a,b</sup> Yan Mu,<sup>c\*</sup> and Guoqing Zhang<sup>a,b\*</sup>**

<sup>a</sup> Hefei National Laboratory for Physical Science at the Microscale, Bio-X

Interdisciplinary Division, University of Science and Technology of China, Hefei,  
230026, China

<sup>b</sup> Anhui Kiwi Biotechnology Corporation Limited, 106 Innovation Ave., Hefei,  
230088, China

<sup>c</sup> First Affiliated Hospital, University of Science and Technology of China, Hefei,  
230026, China

**1. Detailed synthetic procedures for 3a, 3b, 3c, 3d and 3e.**

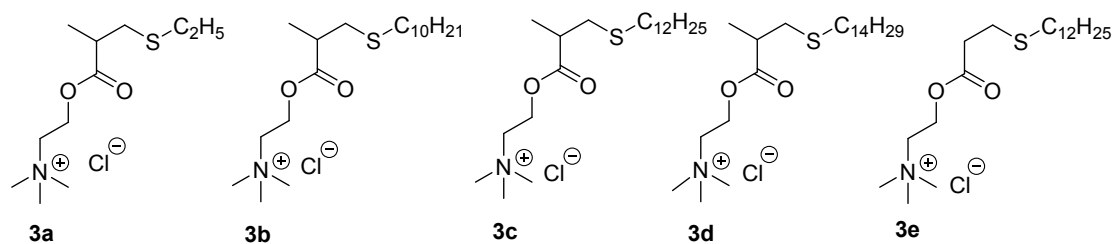

The  $\alpha$ -substituted acrylate ester **1** (25 mmol, 1.0 eq) and the respective thiol **2** (25 mmol, 1.0 eq) were added into to a 100 mL round bottle with acetonitrile, then trimethylamine (1.25 mmol, 0.05 eq) was added *via* syringe. The reaction mixture was stirred at 300 K for 3 days. The volatiles were removed under vacuum to afford the target product **3** without further purification in quantitative yield.

**3a.** <sup>1</sup>H NMR (400 MHz, H<sub>2</sub>O-*d*<sub>2</sub>) 4.59 (m, 2H), 3.75 (t, <sup>3</sup>J<sub>H,H</sub> = 4 Hz, 2H), 3.21 (s, 9H), 2.90 (m, 1H), 2.79 (d, <sup>3</sup>J<sub>H,H</sub> = 8 Hz, 1H), 2.78 (d, <sup>3</sup>J<sub>H,H</sub> = 8 Hz, 1H), 2.57 (q, <sup>3</sup>J<sub>H,H</sub> = 7

Hz, 2H), 1.24-1.22 (d,  $^3J_{\text{H,H}} = 8$  Hz, 3H), 1.22-1.18 (t,  $^3J_{\text{H,H}} = 7$  Hz, 3H).  $^{13}\text{C}$ NMR (101 MHz,  $\text{H}_2\text{O}-d_2$ ) 176.61, 64.6, 58.6, 53.8, 39.9, 33.8, 25.8, 16.0, 14.0. HRMS (ESI+): calculated: 234.1522; found: 234.1516.

**3b.**  $^1\text{H}$  NMR (400 MHz,  $\text{H}_2\text{O}-d_2$ ) 4.60 (br, 2H), 3.81 (t,  $^3J_{\text{H,H}} = 4$  Hz, 2H), 3.27 (s, 9H), 2.84 (m, 2H), 2.62 (m, 1H), 2.60 (t,  $^3J_{\text{H,H}} = 8$  Hz, 2H), 1.6-1.2 (m, 19H), 0.88 (t,  $^3J_{\text{H,H}} = 7$  Hz, 3H).  $^{13}\text{C}$ NMR (101 MHz,  $\text{H}_2\text{O}-d_2$ ) 175.1, 64.6, 58.7, 53.8, 39.8, 34.9, 32.4, 32.0, 29.8, 29.6, 29.5, 29.0, 22.7, 16.1, 14.0.

HRMS (ESI+): calculated: 346.2774; found: 346.2769.

**3c.**  $^1\text{H}$  NMR (400 MHz,  $\text{H}_2\text{O}-d_2$ ) 4.59 (br, 2H), 3.79 (t,  $^3J_{\text{H,H}} = 4$  Hz, 2H), 3.25 (s, 9H), 2.82 (m, 2H), 2.56 (m, 1H), 2.54 (t,  $^3J_{\text{H,H}} = 8$  Hz, 2H), 1.6-1.2 (m, 23H), 0.87 (t,  $^3J_{\text{H,H}} = 7$  Hz, 3H).  $^{13}\text{C}$ NMR (101 MHz,  $\text{H}_2\text{O}-d_2$ ) 175.0, 64.6, 58.7, 53.9, 39.8, 35.0, 32.5, 32.1, 30.1, 30.0, 29.7, 29.6, 29.1, 22.7, 16.1, 14.0. HRMS (ESI+): calculated: 374.3087; found: 374.3087.

**3d.**  $^1\text{H}$  NMR (400 MHz,  $\text{H}_2\text{O}-d_2$ ) 4.60 (br, 2H), 3.83 (t,  $^3J_{\text{H,H}} = 4$  Hz, 2H), 3.27 (s, 9H), 2.84 (m, 2H), 2.62 (m, 1H), 2.60 (t,  $^3J_{\text{H,H}} = 8$  Hz, 2H), 1.6-1.2 (m, 27H), 0.88 (t,  $^3J_{\text{H,H}} = 4$  Hz, 3H).  $^{13}\text{C}$ NMR (101 MHz,  $\text{CHCl}_3-d_1$ ) 174.6, 65.0, 58.7, 54.4, 40.2, 35.4, 33.0, 32.0, 29.8(1), 29.7(18), 29.7(6), 29.7(0), 29.5, 29.4, 29.0, 22.8, 17.0, 14.2. HRMS (ESI+): calculated: 402.3400; found: 402.3394.

**3e.**  $^1\text{H}$  NMR (400 MHz,  $\text{H}_2\text{O}-d_2$ ) 4.60 (br, 2H), 3.80 (t,  $^3J_{\text{H,H}} = 4$  Hz, 2H), 3.26 (s, 9H), 2.78 (m, 4H), 2.57 (t,  $^3J_{\text{H,H}} = 8\text{Hz}$ , 2H), 1.58 (m, 2H), 1.18-1.47 (m, 18H), 0.87 (t,  $^3J_{\text{H,H}} = 8\text{Hz}$ , 3H).  $^{13}\text{C}$ NMR (101 MHz,  $\text{H}_2\text{O}-d_2$ ) 172.3, 64.5, 58.5, 57.4, 53.9, 34.4, 32.1, 31.8, 30.1, 30.0, 29.9, 29.7, 29.6, 29.5, 29.1, 26.4, 22.7, 16.8, 13.9. HRMS (ESI+): calculated: 360.2931; found: 360.2925.

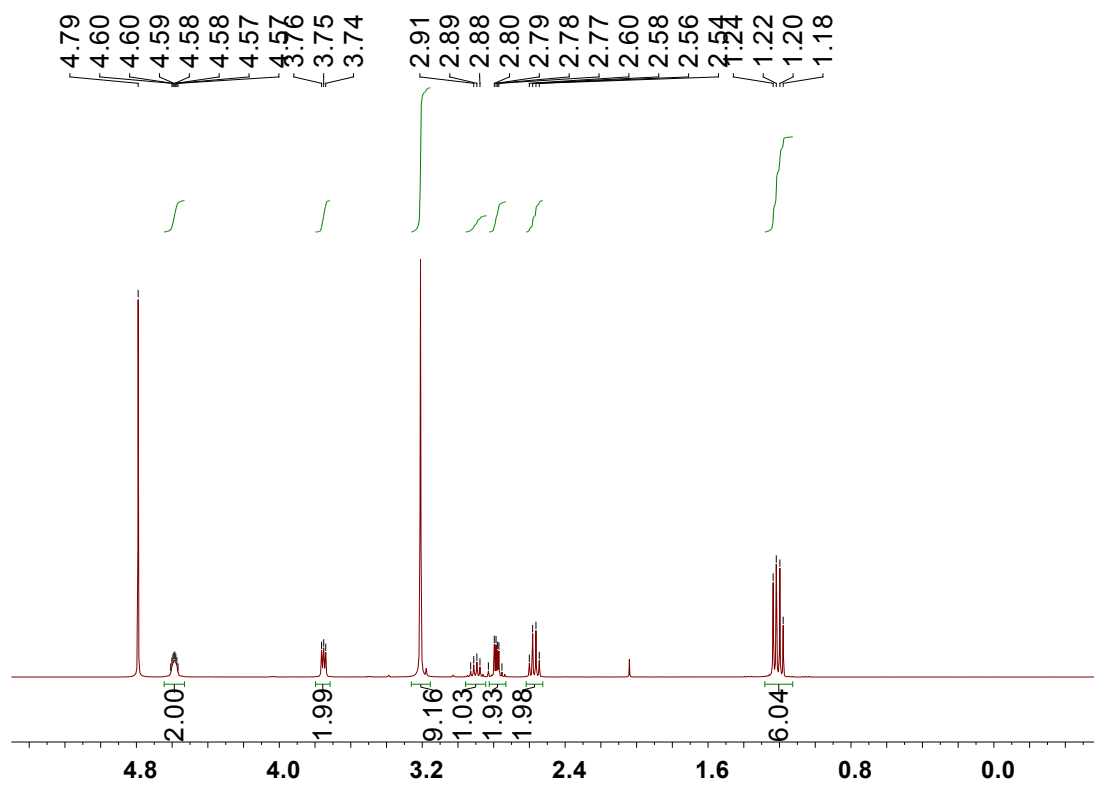

Fig S1.  $^1\text{H}$  NMR spectrum of **3a** in  $\text{D}_2\text{O}$ .

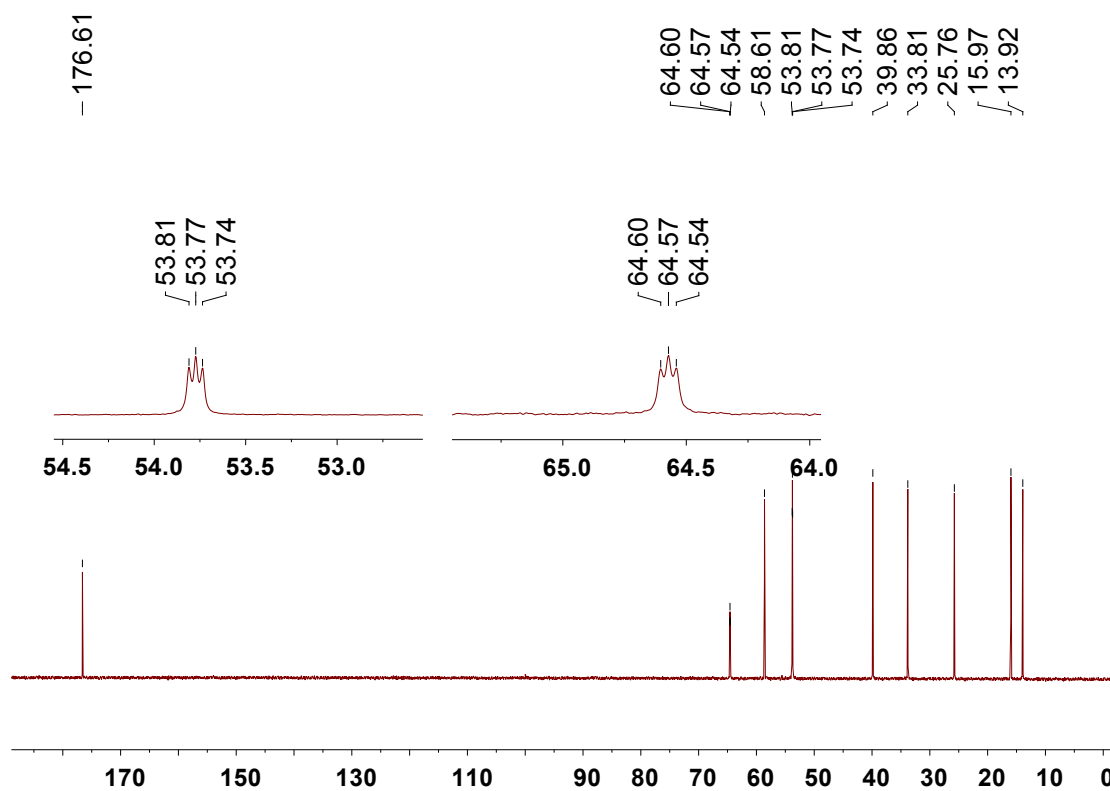

Fig S2.  $^{13}\text{C}$  NMR spectrum of **3a** in  $\text{D}_2\text{O}$ .

T: FTMS + c ESI Full ms [50.00-600.00]

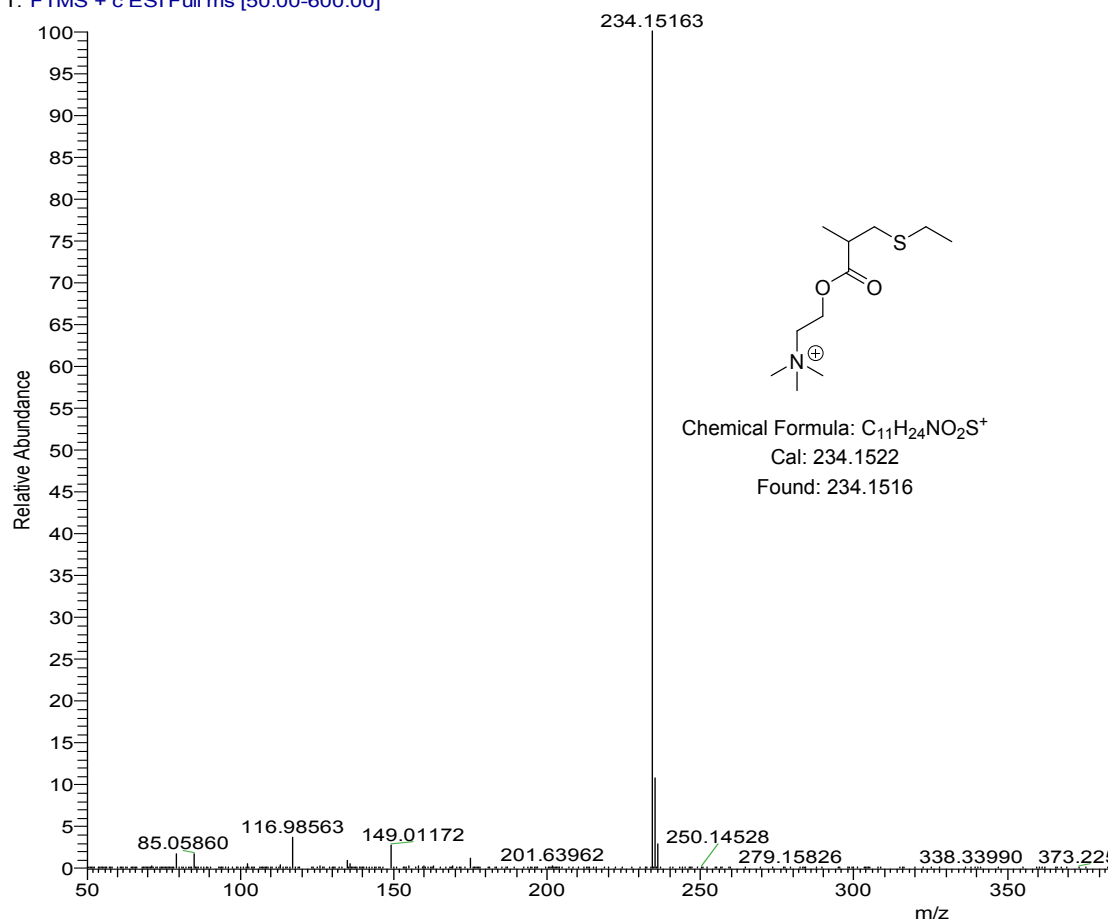

Fig S3. ESI mass spectrum of compound 3a.

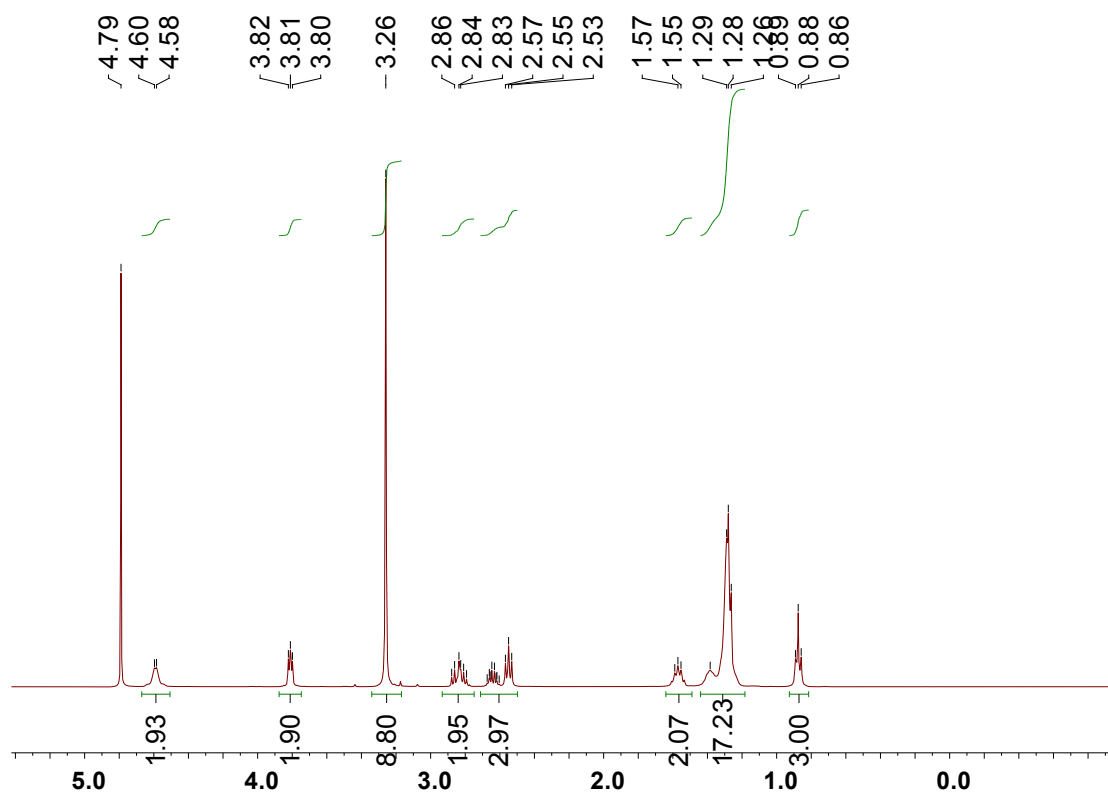

Fig S4. <sup>1</sup>H NMR spectrum of **3b** in D<sub>2</sub>O.

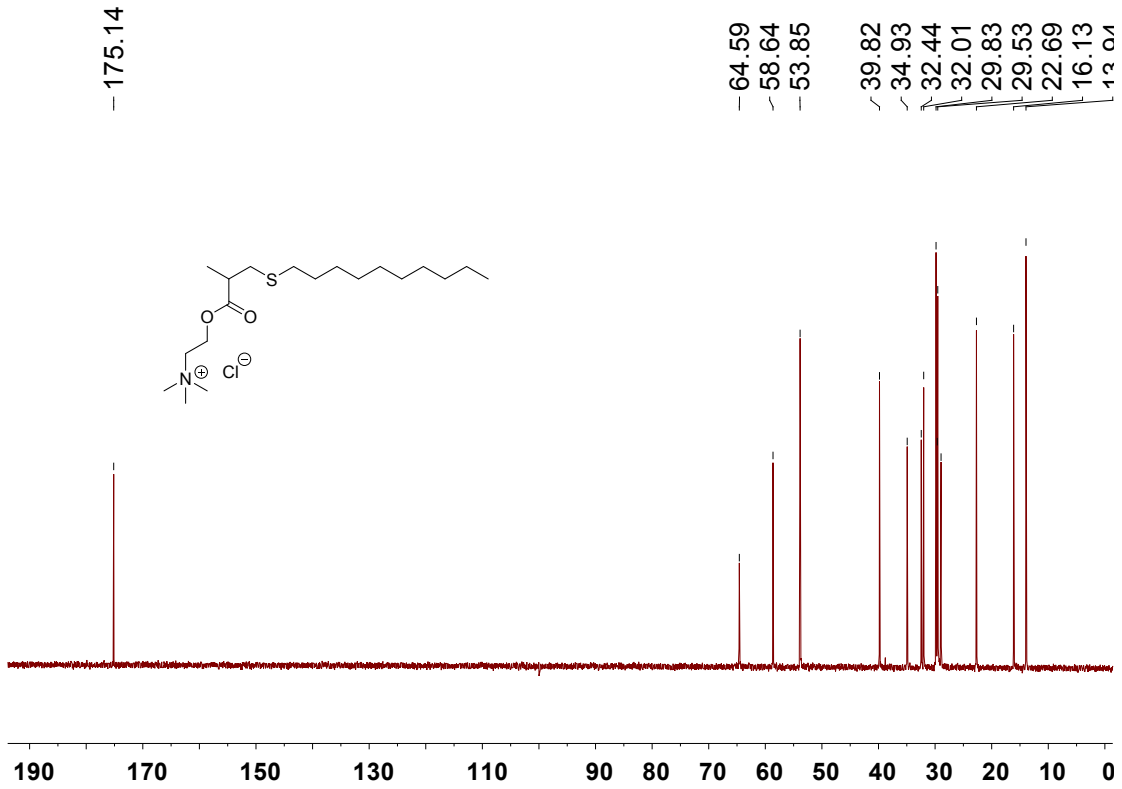

Fig S5. <sup>13</sup>C NMR spectrum of **3b** in D<sub>2</sub>O.

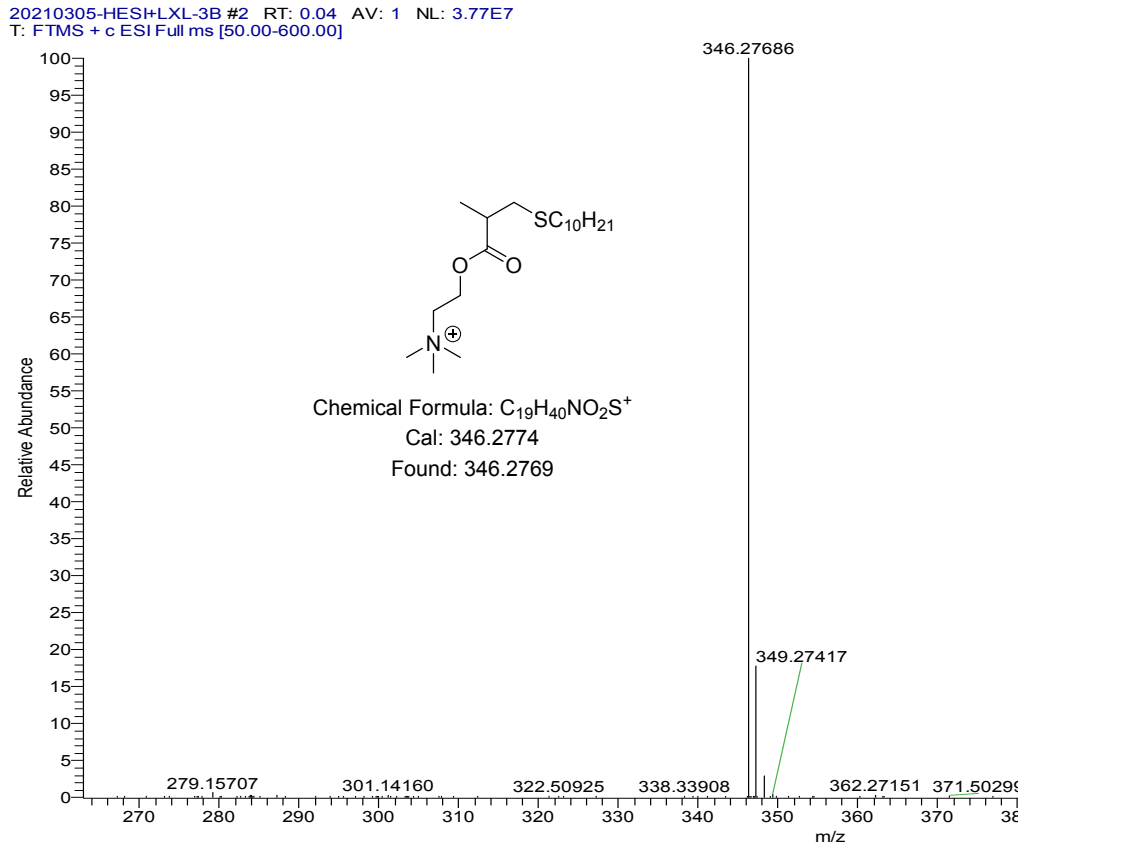

Fig S6. ESI mass spectrum of compound 3b.

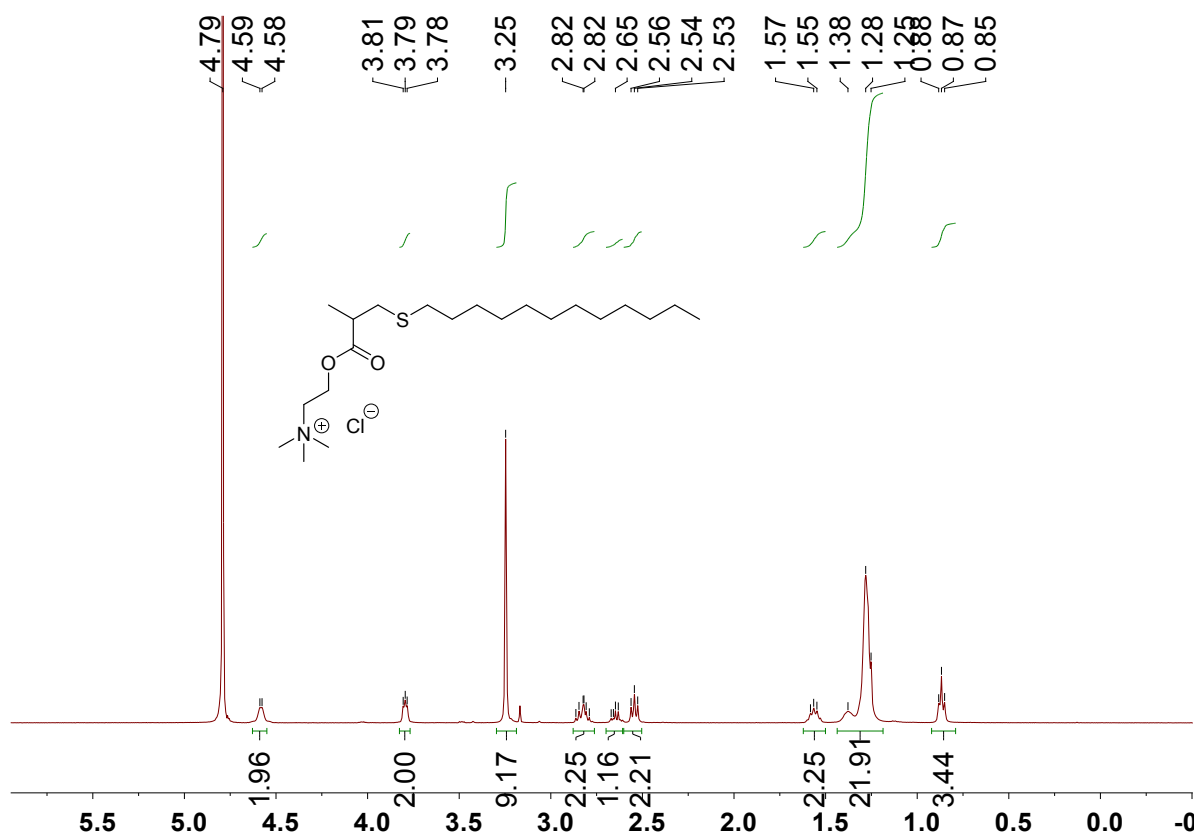

Fig S7. <sup>1</sup>H NMR spectrum of molecule 3c in D<sub>2</sub>O.

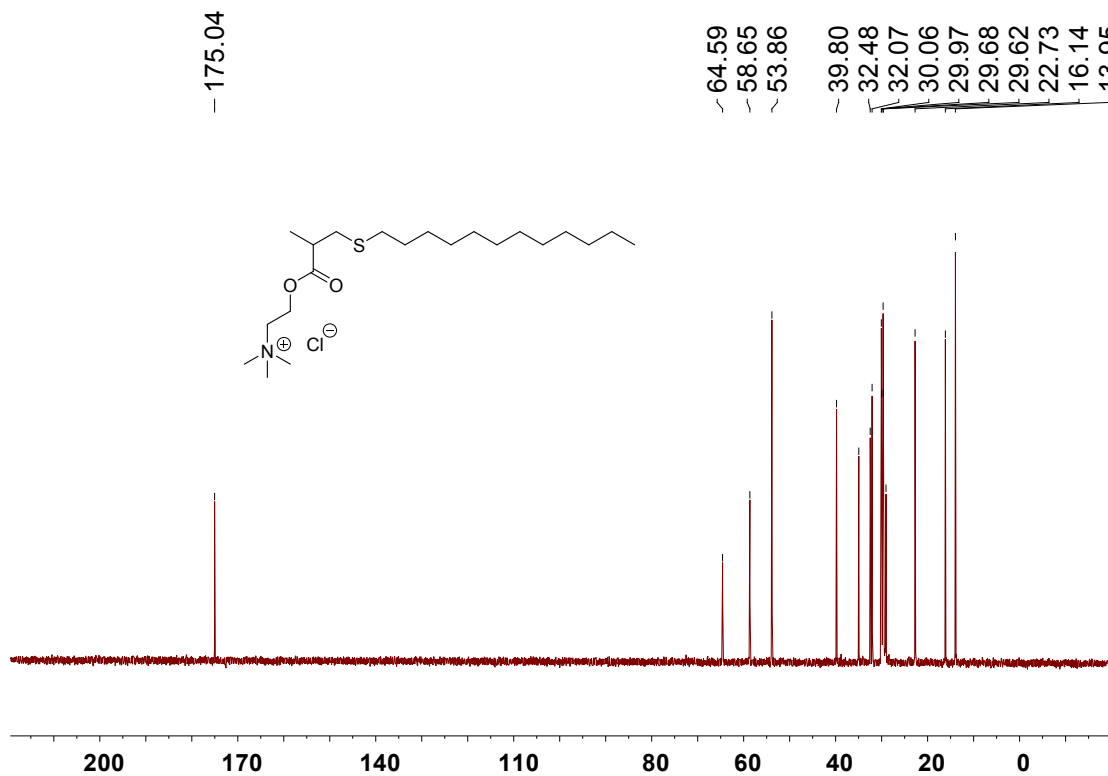

**Fig S8.**  $^{13}\text{C}$  NMR spectrum of molecule **3c** in  $\text{D}_2\text{O}$ .

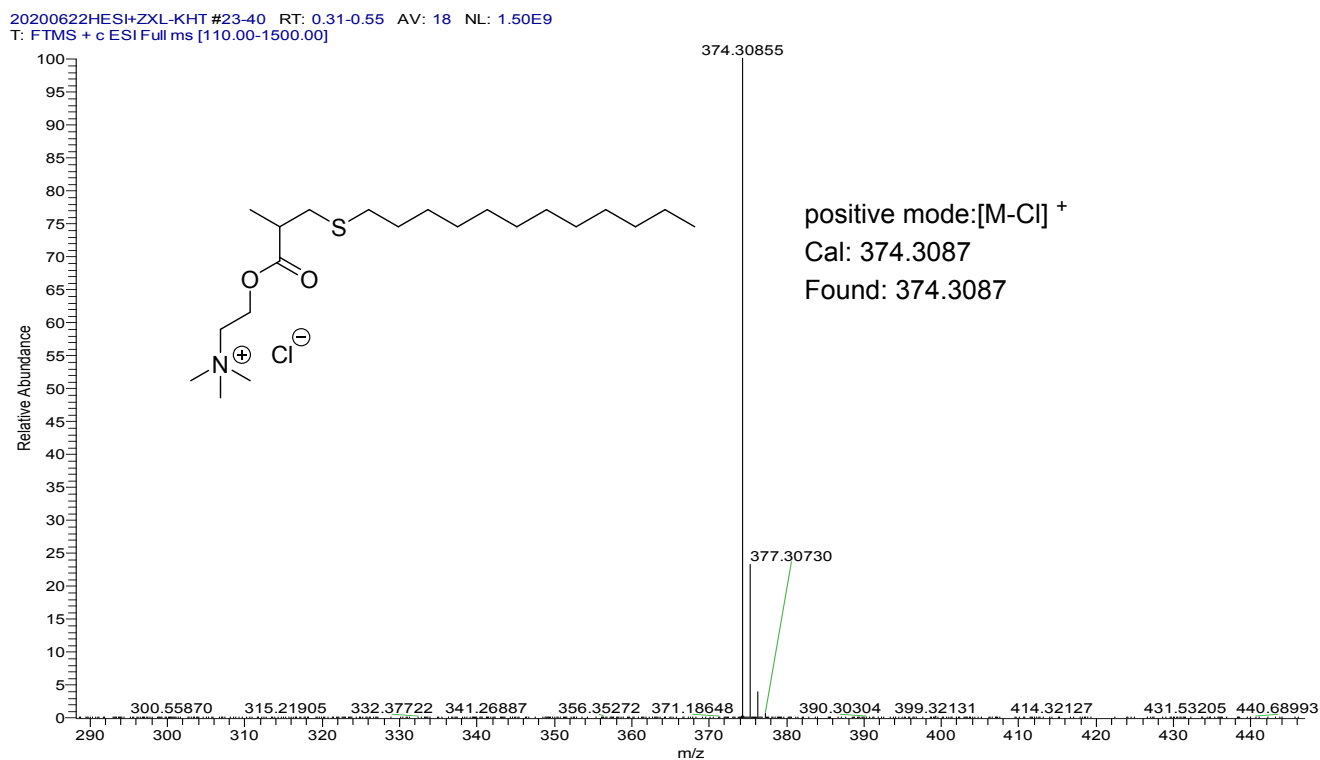

**Fig S9.** ESI mass spectrum of compound **3c**.

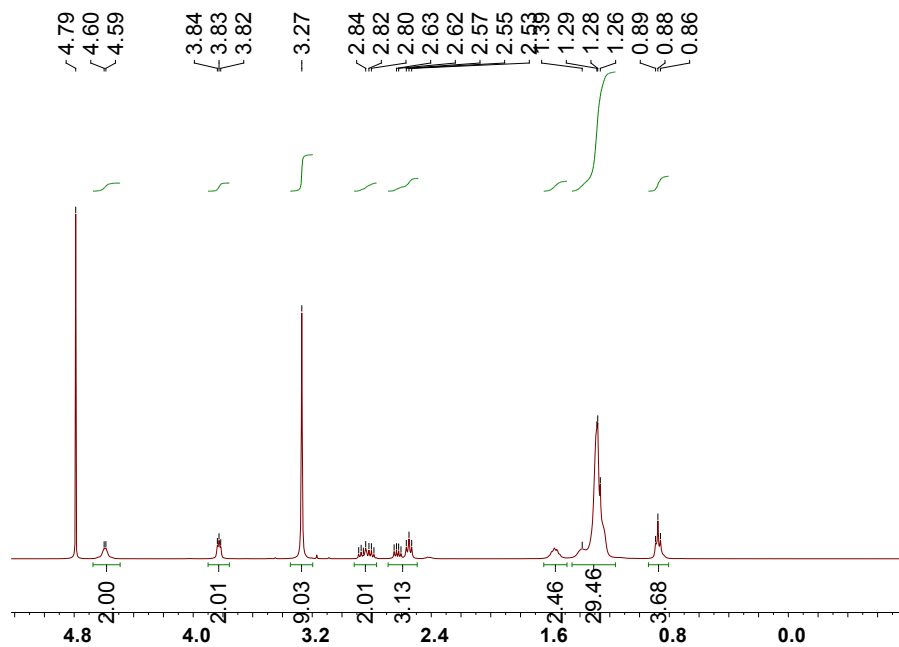

**Fig S10.**  $^1\text{H}$  NMR spectrum of compound **3d** in  $\text{D}_2\text{O}$ .

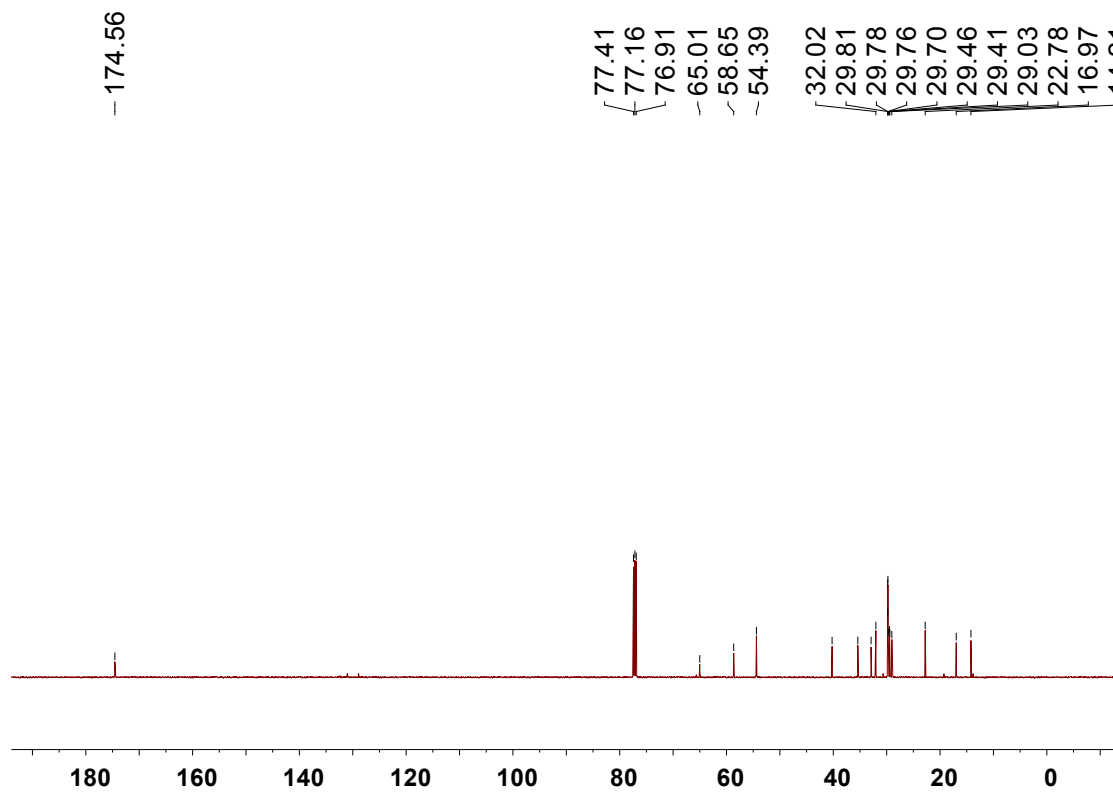

Fig S11.  $^{13}\text{C}$  NMR spectrum of molecule **3d** in  $\text{CDCl}_3$ .

20210305-HESI+LXL-3D #14 RT: 0.56 AV: 1 NL: 1.92E7  
T: FTMS + c ESI Full ms [50.00-600.00]

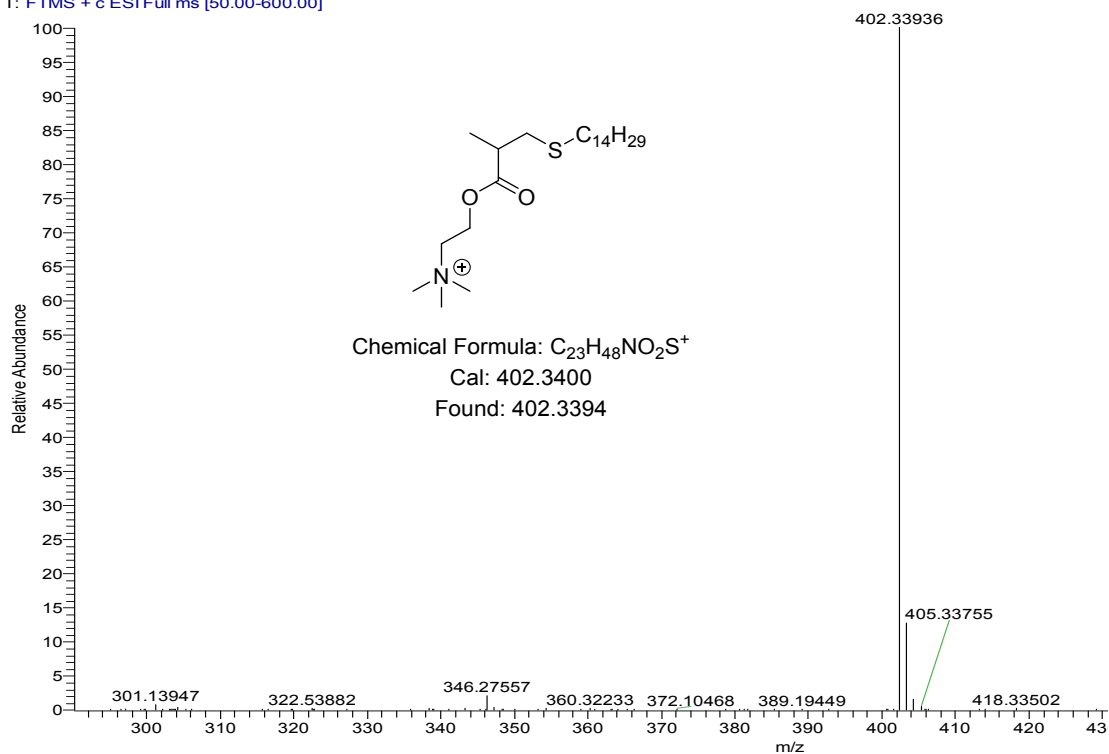

Fig S12. ESI mass spectrum of compound **3d**.



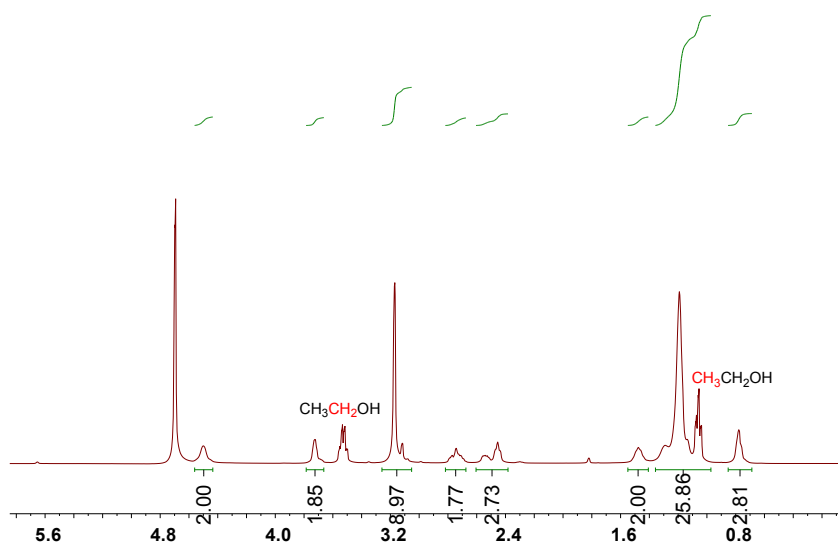

**Fig S13.** The product was isolated from the reaction in 50-L container and was pure by  $^1\text{H}$  NMR spectrum in  $\text{D}_2\text{O}$ .

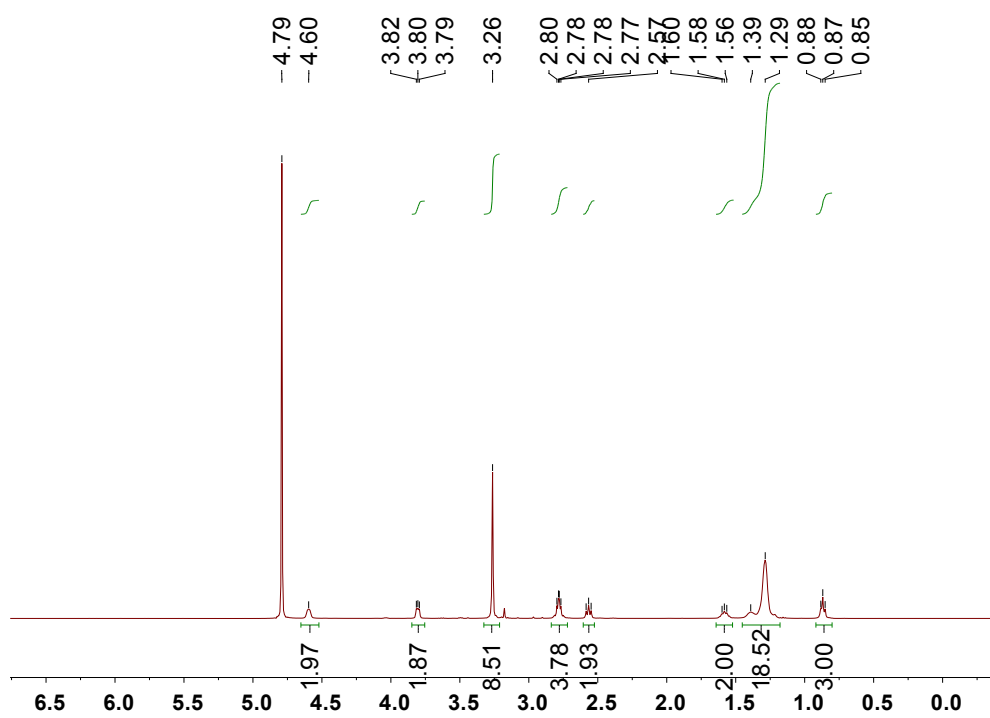

**Fig S14.**  $^1\text{H}$  NMR spectrum of compound **3e** in  $\text{D}_2\text{O}$ .

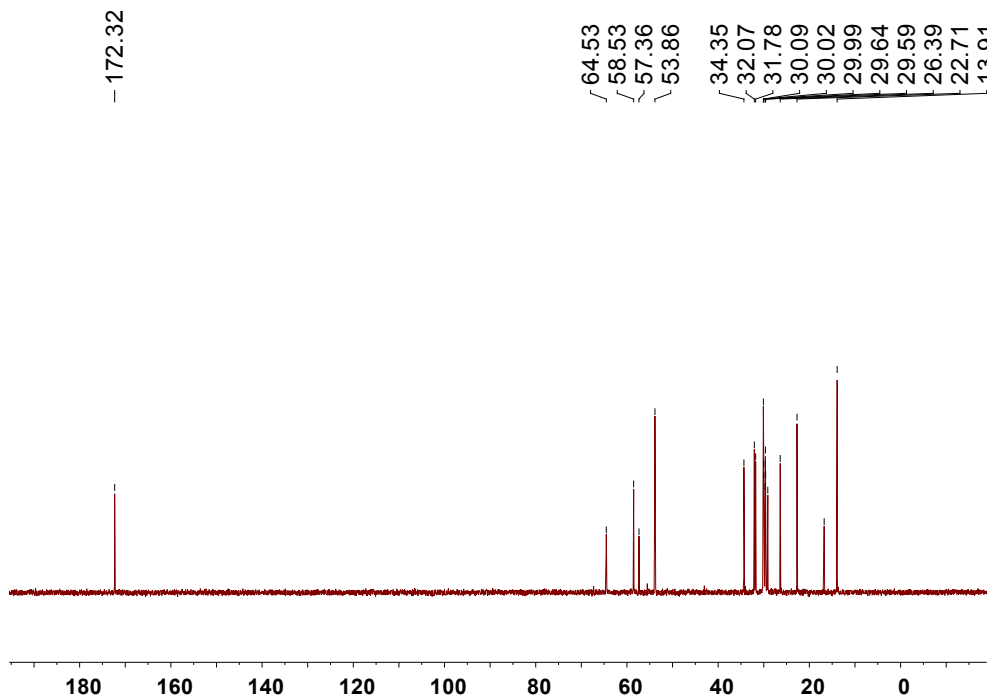

**Fig S15.**  $^{13}\text{C}$  NMR spectrum of molecule **3e** in  $\text{D}_2\text{O}$ .

20210623HESI+2XL-3E #26 RT: 0.36 AV: 1 NL: 1.27E9  
 T: FTMS + c ESI Full ms [50.00-800.00]

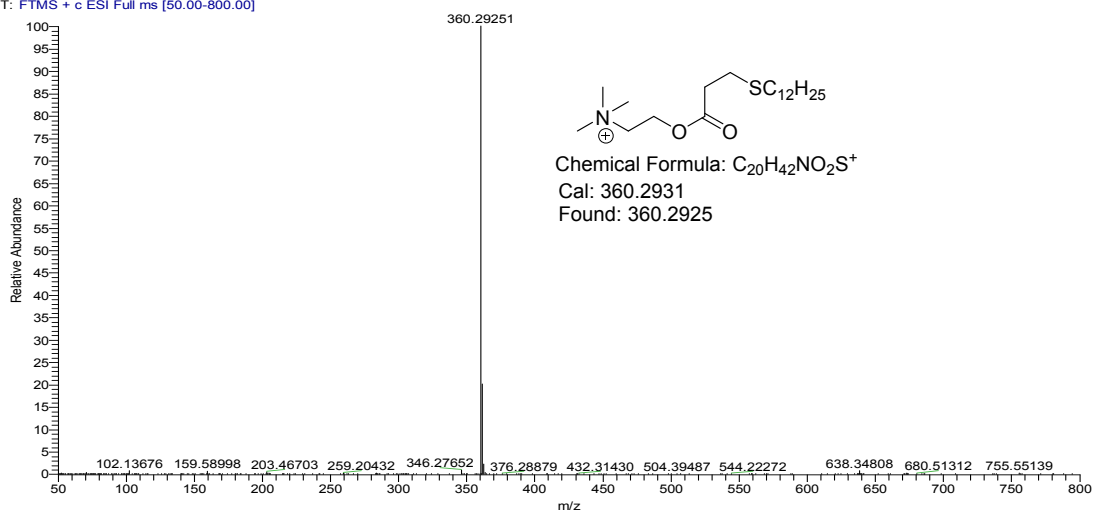

**Fig S16.** ESI mass spectrum of compound **3e**.

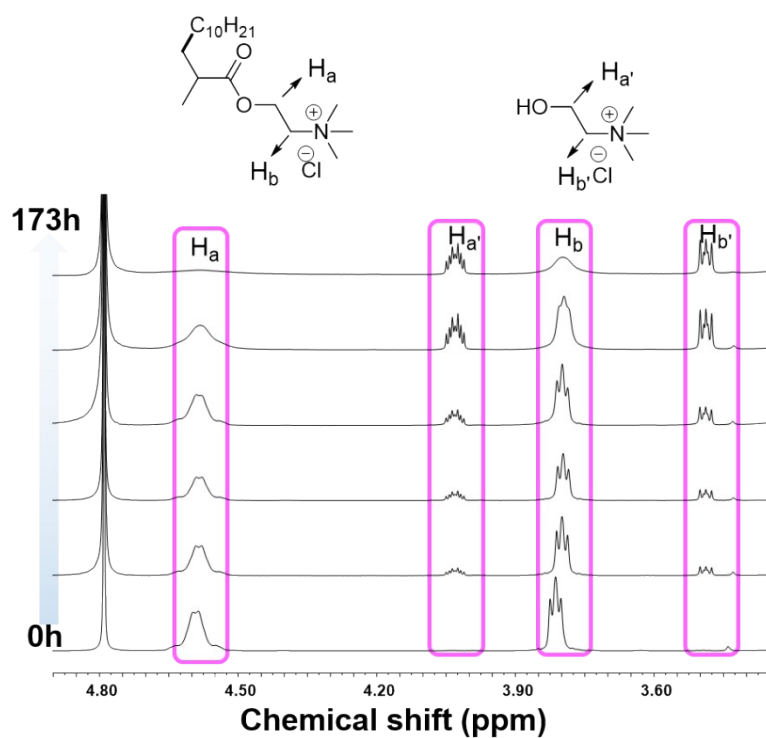

**Fig S17.** Partial stacked  $^1\text{H}$  NMR spectra (400 MHz,  $\text{D}_2\text{O}$ ) of compound **3b** and degradation product **4** in natural (university pond) water (1% wt, pH = 7.60, 327 K) measured at different time points.

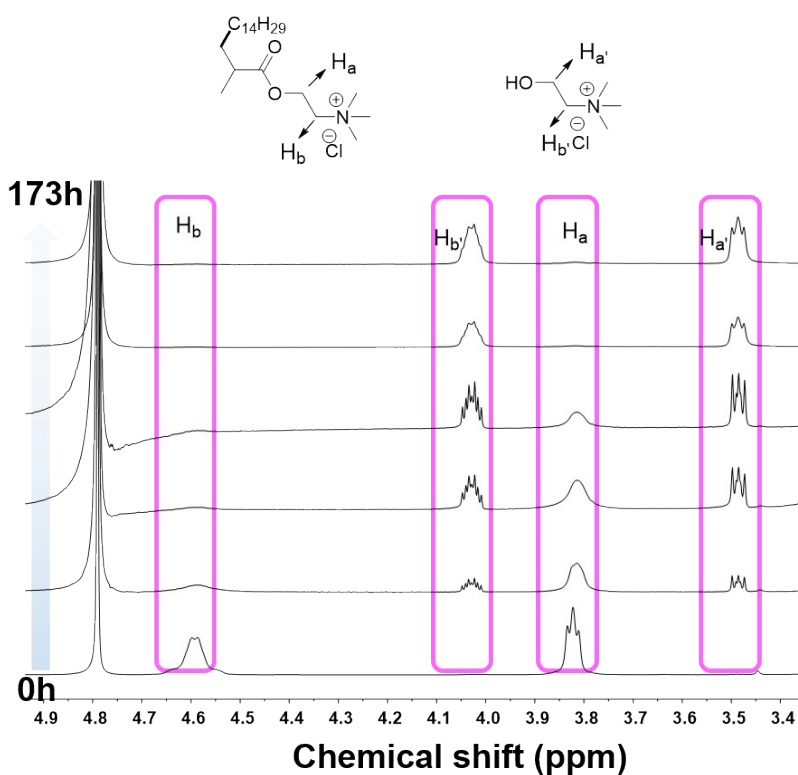

**Fig S18.** Partial stacked  $^1\text{H}$  NMR spectra (400 MHz,  $\text{D}_2\text{O}$ ) of compound **3d** and degradation product **4** in natural (university pond) water (1% wt, pH = 7.60, 327 K) measured at different time points.

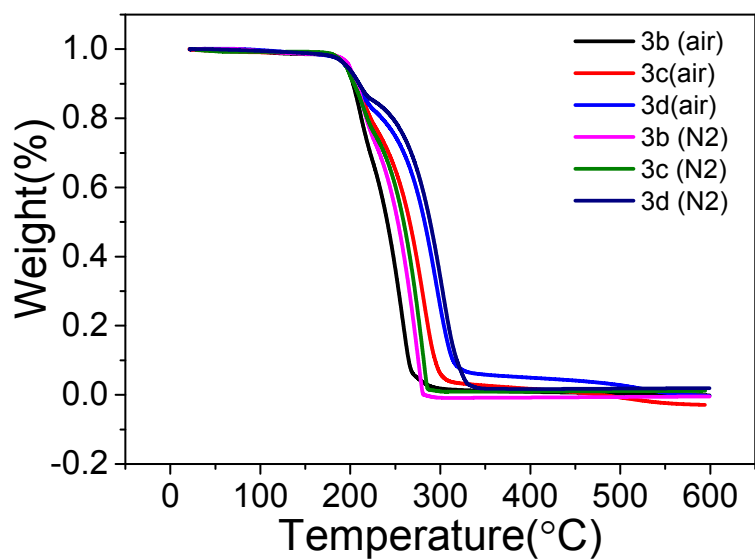

**Fig S19.** Thermal gravimetric analysis (TGA) graph of compound **3b**, **3c**, **3d** under N<sub>2</sub> or air at a temperature increase rate of 10 °C/min from 20 to 600 °C.

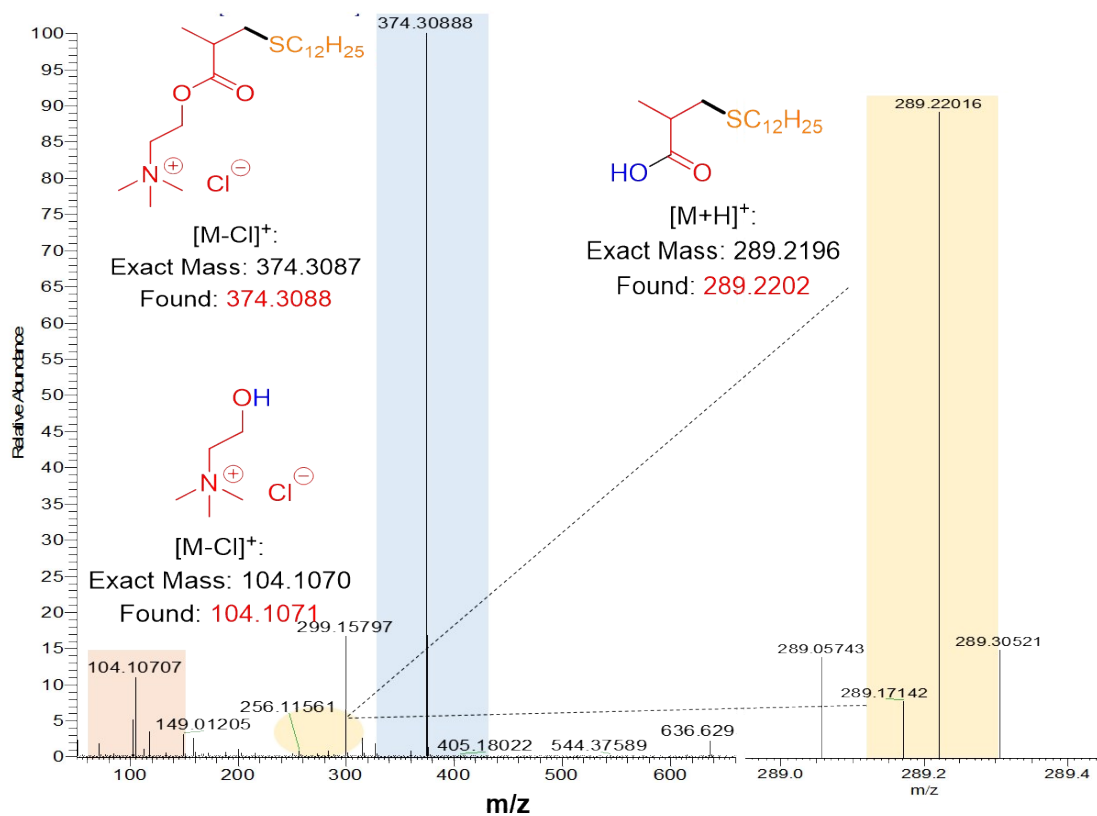

**Fig S20.** ESI mass spectrum of the degraded product of **3c** in natural water.

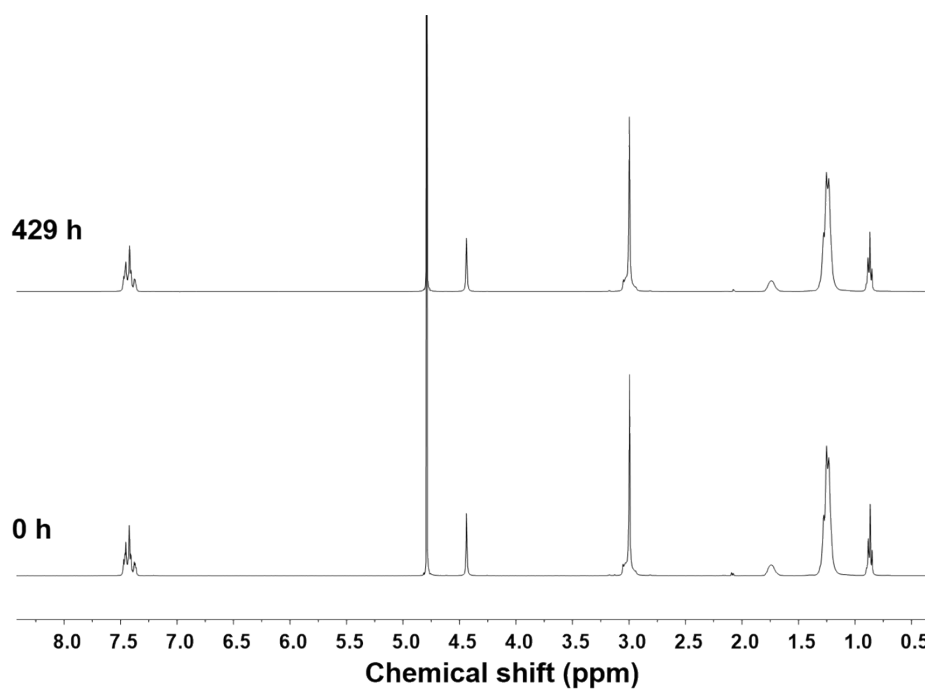

**Fig S21.** Partial stacked <sup>1</sup>H NMR spectra (400 MHz, D<sub>2</sub>O) of benzalkonium chloride in natural (university pond) water (1% wt, pH =7.6, 327 K) measured at 0 h and 429 h. The data show that benzalkonium chloride was stable under experimental condition.

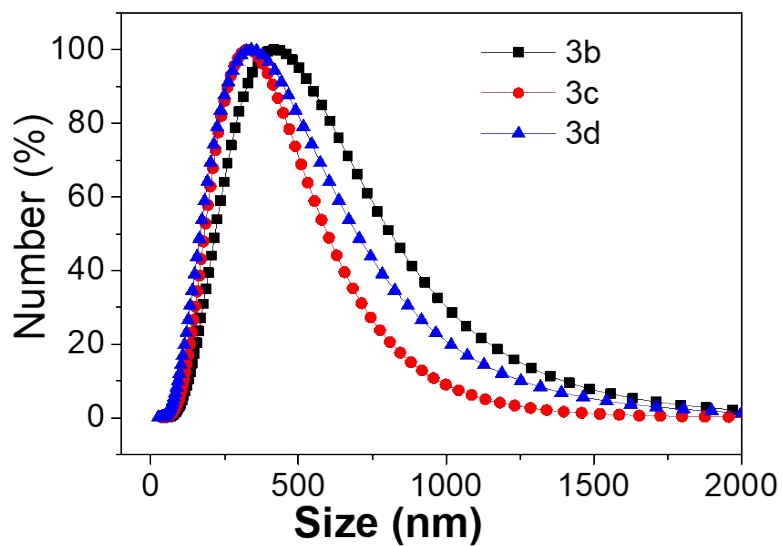

**Fig S22.** The DLS data of compound **3a** (1mg/mL), **3b** (1mg/mL), **3c** (1mg/mL) in natural water.

Ethanaminium,2-(3-dodecylthio-2-methyl-1-oxopropoxy)-N,N,N-trimethyl-,chloride against *Escherichia coli*

| The results                                              | Test serial number        | 1                         | 2                         | 3                         |
|----------------------------------------------------------|---------------------------|---------------------------|---------------------------|---------------------------|
| Inhibitor concentration (%) and bacterial growth results | 0.1                       | Sterile growth            | Sterile growth            | Sterile growth            |
|                                                          | 0.05                      | Sterile growth            | Sterile growth            | Sterile growth            |
|                                                          | 0.025                     | Sterile growth            | Sterile growth            | Sterile growth            |
|                                                          | 0.0125                    | Sterile growth            | Sterile growth            | Sterile growth            |
|                                                          | 0.00625                   | Sterile growth            | Sterile growth            | Sterile growth            |
|                                                          | 0.003125                  | Sterile growth            | Sterile growth            | Sterile growth            |
|                                                          | 0.0015625                 | There are bacteria growth | There are bacteria growth | There are bacteria growth |
|                                                          | 0.00078125                | There are bacteria growth | There are bacteria growth | There are bacteria growth |
|                                                          | 0.000390625               | There are bacteria growth | There are bacteria growth | There are bacteria growth |
|                                                          | 0.0001953125              | There are bacteria growth | There are bacteria growth | There are bacteria growth |
| 0.00009765625                                            | There are bacteria growth | There are bacteria growth | There are bacteria growth |                           |
| Average colony number of positive control group (cfu/mL) |                           | $7.55 \times 10^5$        | $3.60 \times 10^6$        | $5.95 \times 10^5$        |

Note: The negative control group grew aseptically.

**Fig S23.** Third-party report for the antimicrobial activity of **3c** (0.1% wt, 1 min) against *E. coli*.

Ethanaminium,2-(3-dodecylthio-2-methyl-1-oxopropoxy)-N,N,N-trimethyl-,chloride against *Staphylococcus aureus*

| The results                                              | Test serial number        | 1                         | 2                         | 3                         |
|----------------------------------------------------------|---------------------------|---------------------------|---------------------------|---------------------------|
| Inhibitor concentration (%) and bacterial growth results | 0.1                       | Sterile growth            | Sterile growth            | Sterile growth            |
|                                                          | 0.05                      | Sterile growth            | Sterile growth            | Sterile growth            |
|                                                          | 0.025                     | Sterile growth            | Sterile growth            | Sterile growth            |
|                                                          | 0.0125                    | Sterile growth            | Sterile growth            | Sterile growth            |
|                                                          | 0.00625                   | Sterile growth            | Sterile growth            | Sterile growth            |
|                                                          | 0.003125                  | Sterile growth            | Sterile growth            | Sterile growth            |
|                                                          | 0.0015625                 | Sterile growth            | Sterile growth            | Sterile growth            |
|                                                          | 0.00078125                | Sterile growth            | Sterile growth            | Sterile growth            |
|                                                          | 0.000390625               | Sterile growth            | Sterile growth            | Sterile growth            |
|                                                          | 0.0001953125              | There are bacteria growth | There are bacteria growth | There are bacteria growth |
| 0.00009765625                                            | There are bacteria growth | There are bacteria growth | There are bacteria growth |                           |
| Average colony number of positive control group (cfu/mL) |                           | $4.05 \times 10^6$        | $6.90 \times 10^5$        | $8.15 \times 10^5$        |

Note: The negative control group grew aseptically.

**Fig S24.** Third-party report for antimicrobial activity of **3c** (0.1% wt, 1 min) against *S. aureus*.

Ethanaminium,2-(3-dodecylthio-2-methyl-1-oxopropoxy)-N,N,N-trimethyl-,chloride against *Candida albicans*

| The results                                              | Test serial number        | 1                         | 2                         | 3                         |
|----------------------------------------------------------|---------------------------|---------------------------|---------------------------|---------------------------|
| Inhibitor concentration (%) and bacterial growth results | 0.1                       | Sterile growth            | Sterile growth            | Sterile growth            |
|                                                          | 0.05                      | Sterile growth            | Sterile growth            | Sterile growth            |
|                                                          | 0.025                     | Sterile growth            | Sterile growth            | Sterile growth            |
|                                                          | 0.0125                    | Sterile growth            | Sterile growth            | Sterile growth            |
|                                                          | 0.00625                   | Sterile growth            | Sterile growth            | Sterile growth            |
|                                                          | 0.003125                  | Sterile growth            | Sterile growth            | Sterile growth            |
|                                                          | 0.0015625                 | Sterile growth            | Sterile growth            | Sterile growth            |
|                                                          | 0.00078125                | There are bacteria growth | There are bacteria growth | There are bacteria growth |
|                                                          | 0.000390625               | There are bacteria growth | There are bacteria growth | There are bacteria growth |
|                                                          | 0.0001953125              | There are bacteria growth | There are bacteria growth | There are bacteria growth |
| 0.00009765625                                            | There are bacteria growth | There are bacteria growth | There are bacteria growth |                           |
| Average colony number of positive control group (cfu/mL) |                           | $1.15 \times 10^6$        | $8.70 \times 10^5$        | $4.80 \times 10^6$        |

Note: The negative control group grew aseptically.

**Fig S25.** Third-party report for antimicrobial activity of **3c** (0.1% wt, 1 min) against *C. albicans*.

Ethanaminium,2-(3-dodecylthio-2-methyl-1-oxopropoxy)-N,N,N-trimethyl-,chloride against *Aspergillus Niger*

| The results                                              | Test serial number        | 1                         | 2                         | 3                         |
|----------------------------------------------------------|---------------------------|---------------------------|---------------------------|---------------------------|
| Inhibitor concentration (%) and bacterial growth results | 0.1                       | Sterile growth            | Sterile growth            | Sterile growth            |
|                                                          | 0.05                      | Sterile growth            | Sterile growth            | Sterile growth            |
|                                                          | 0.025                     | Sterile growth            | Sterile growth            | Sterile growth            |
|                                                          | 0.0125                    | Sterile growth            | Sterile growth            | Sterile growth            |
|                                                          | 0.00625                   | Sterile growth            | Sterile growth            | Sterile growth            |
|                                                          | 0.003125                  | There are bacteria growth | There are bacteria growth | There are bacteria growth |
|                                                          | 0.0015625                 | There are bacteria growth | There are bacteria growth | There are bacteria growth |
|                                                          | 0.00078125                | There are bacteria growth | There are bacteria growth | There are bacteria growth |
|                                                          | 0.000390625               | There are bacteria growth | There are bacteria growth | There are bacteria growth |
|                                                          | 0.0001953125              | There are bacteria growth | There are bacteria growth | There are bacteria growth |
| 0.00009765625                                            | There are bacteria growth | There are bacteria growth | There are bacteria growth |                           |
| Average colony number of positive control group (cfu/mL) |                           | $7.40 \times 10^5$        | $2.35 \times 10^6$        | $1.40 \times 10^5$        |

Note: The negative control group grew aseptically.

**Fig S26.** Third-party report for antimicrobial activity of **3c** (0.1% wt, 1 min) against *A. niger*.

Ethanaminium,2-(3-dodecylthio-2-methyl-1-oxopropoxy)-N,N,N-trimethyl-,chloride against *Pseudomonas aeruginosa*

| The results                                              |  | Test serial number | 1                         | 2                         | 3                         |
|----------------------------------------------------------|--|--------------------|---------------------------|---------------------------|---------------------------|
| Inhibitor concentration (%) and bacterial growth results |  | 0.1                | Sterile growth            | Sterile growth            | Sterile growth            |
|                                                          |  | 0.05               | Sterile growth            | Sterile growth            | Sterile growth            |
|                                                          |  | 0.025              | Sterile growth            | Sterile growth            | Sterile growth            |
|                                                          |  | 0.0125             | There are bacteria growth | There are bacteria growth | There are bacteria growth |
|                                                          |  | 0.00625            | There are bacteria growth | There are bacteria growth | There are bacteria growth |
|                                                          |  | 0.003125           | There are bacteria growth | There are bacteria growth | There are bacteria growth |
|                                                          |  | 0.0015625          | There are bacteria growth | There are bacteria growth | There are bacteria growth |
|                                                          |  | 0.00078125         | There are bacteria growth | There are bacteria growth | There are bacteria growth |
|                                                          |  | 0.000390625        | There are bacteria growth | There are bacteria growth | There are bacteria growth |
|                                                          |  | 0.0001953125       | There are bacteria growth | There are bacteria growth | There are bacteria growth |
|                                                          |  | 0.00009765625      | There are bacteria growth | There are bacteria growth | There are bacteria growth |
| Average colony number of positive control group (cfu/mL) |  |                    | $2.45 \times 10^6$        | $1.80 \times 10^6$        | $9.45 \times 10^5$        |

Note: The negative control group grew aseptically.

**Fig S27.** Third-party report for the antimicrobial activity of **3c** (0.1% wt, 1 min) against *P. aeruginosa*.

1. 检测项目：病毒灭活试验

1.1 检测方法：参照《消毒技术规范》2002年版

1.2 试验结果：

| 实验病毒及宿主                               | 作用浓度及时间         | 组别    | 病毒滴度对数值<br>lgTCID <sub>50</sub> /ml | 平均病毒滴度对数值<br>lgTCID <sub>50</sub> /ml | 平均病毒总数<br>TCID <sub>50</sub> /ml | 平均灭活对数值<br>(KL) | 病毒灭活率<br>% |
|---------------------------------------|-----------------|-------|-------------------------------------|---------------------------------------|----------------------------------|-----------------|------------|
| 甲型流感病毒<br>H1N1<br>宿主名称：<br>Vero-E6 细胞 | 1:1 稀释<br>30min | 对照组 1 | 5.57                                | 5.52                                  | $3.31 \times 10^5$               | >4.02           | >99.99     |
|                                       |                 | 对照组 2 | 5.52                                |                                       |                                  |                 |            |
|                                       |                 | 对照组 3 | 5.56                                |                                       |                                  |                 |            |
|                                       |                 | 试验组 1 | <1.50                               | <1.50                                 | <31.6                            |                 |            |
|                                       |                 | 试验组 2 | <1.50                               |                                       |                                  |                 |            |
|                                       |                 | 试验组 3 | <1.50                               |                                       |                                  |                 |            |

\*阴性对照组细胞生长良好，试验结果符合评价规定的全部条件。



| Virus/Host cell     | sample    | Log10 (TCID50/mL) | Mean TCID50/mL | Log10 Reduction        | Reduction Rate (%) |
|---------------------|-----------|-------------------|----------------|------------------------|--------------------|
| <b>H1N1/Vero-E6</b> | control   | 1                 | 5.57           | 3.31 x 10 <sup>5</sup> | >4.02              |
|                     |           | 2                 | 5.52           |                        |                    |
|                     |           | 3                 | 5.56           |                        |                    |
|                     | <b>3c</b> | 1                 | <1.5           | < 31.6                 | >99.99             |
|                     |           | 2                 | <1.5           |                        |                    |
|                     |           | 3                 | <1.5           |                        |                    |

**Note:** The cultured cells in negative control group were observed growing well.

**Fig S28.** The virus inactivation study of compound **3c** (0.5% wt, 15 min) against H1N1, with original report in Chinese and translated results.

1. 检测项目：病毒灭活试验

1.1 检测方法：参照《消毒技术规范》2002年版

1.2 试验结果：

| 实验病毒及宿主                           | 作用浓度及时间         | 组别    | 病毒滴度对数值 lgTCID <sub>50</sub> /ml | 平均病毒滴度对数值 lgTCID <sub>50</sub> /ml | 平均病毒总数 TCID <sub>50</sub> /ml | 平均灭活对数值 (KL) | 病毒灭活率 % |
|-----------------------------------|-----------------|-------|----------------------------------|------------------------------------|-------------------------------|--------------|---------|
| 非洲猪瘟病毒 ASF<br>宿主名称：<br>Vero-E6 细胞 | 1:1 稀释<br>30min | 对照组 1 | 5.59                             | 5.62                               | 4.17×10 <sup>5</sup>          | >4.11        | >99.99  |
|                                   |                 | 对照组 2 | 5.61                             |                                    |                               |              |         |
|                                   |                 | 对照组 3 | 5.67                             |                                    |                               |              |         |
|                                   |                 | 试验组 1 | <1.50                            | <1.50                              | <31.6                         |              |         |
|                                   |                 | 试验组 2 | <1.50                            |                                    |                               |              |         |
|                                   |                 | 试验组 3 | <1.50                            |                                    |                               |              |         |

\*阴性对照组细胞生长良好，试验结果符合评价规定的全部条件。

| Virus/Host cell    | sample    | Log10 (TCID50/mL) | Mean TCID50/mL | Log10 Reduction        | Reduction Rate (%) |
|--------------------|-----------|-------------------|----------------|------------------------|--------------------|
| <b>ASF/Vero-E6</b> | control   | 1                 | 5.57           | 4.17 x 10 <sup>5</sup> | >4.11              |
|                    |           | 2                 | 5.59           |                        |                    |
|                    |           | 3                 | 5.61           |                        |                    |
|                    | <b>3c</b> | 1                 | <1.5           | < 31.6                 | >99.99             |
|                    |           | 2                 | <1.5           |                        |                    |
|                    |           | 3                 | <1.5           |                        |                    |

**Note:** The cultured cells in negative control group were observed growing well

**Fig S29.** The virus inactivation study of compound **3c** (0.5% wt, 30 min) against ASF, with original report in Chinese and translated results.

## 2. Detailed synthetic procedures for degradation products **5a**, **5b**, **5c**, and **5d** used

**for antimicrobial test control group.**

The obtained QACs (**3a-3d**) (25 mmol) without further purification were dissolved in water or mixture of water and ethanol in 100 mL round-bottle, then a NaOH (25 mmol, 5 mol/L in water) solution was added to the each QAC solution. The mixtures were stirred at 333 K for ca. 6 hours. Then the pH was lowered to 1-2 with a dropwise addition of HCl (12 M). The sulfide was extracted with EtOAc (30 mL×3). The organic layer was dried over anhydrous MgSO<sub>4</sub>, filtered, and concentrated in vacuo. After evaporation, the residue was purified by chromatography on silica gel to afford the degraded product (eluent: petroleum ether/ethyl acetate : 20/1 to 5/1) .

**5a**, 75 %, light yellow oil, <sup>1</sup>H NMR (400 MHz, CHCl<sub>3</sub>-d<sub>1</sub>) 2.86 (dd, <sup>2</sup>J<sub>H,H</sub> = 13Hz, <sup>3</sup>J<sub>H,H</sub> = 7Hz, 1H), 2.70 (ddq, <sup>2</sup>J<sub>H,H</sub> = 13Hz, <sup>3</sup>J<sub>H,H</sub> = 7Hz, <sup>3</sup>J<sub>H,H</sub> = 7Hz, 1H), 2.59 (dd, <sup>2</sup>J<sub>H,H</sub> = 13Hz, <sup>3</sup>J<sub>H,H</sub> = 7Hz, 1H), 2.54 (t, <sup>3</sup>J<sub>H,H</sub> = 7Hz, 2H ), 1.29 (d, <sup>3</sup>J<sub>H,H</sub> = 7Hz, 3H) , 1.25 (<sup>3</sup>J<sub>H,H</sub> = 7Hz, 3H). <sup>13</sup>CNMR (101 MHz, CHCl<sub>3</sub>-d<sub>1</sub>) 181.9, 40.2, 34.7, 26.5, 16.7, 14.7. HRMS (ESI+): calculated: 149.0631; found: 149.0629.

**5b**, 67%, white solid, <sup>1</sup>H NMR (400 MHz, CHCl<sub>3</sub>-d<sub>1</sub>) 2.85 (dd, <sup>2</sup>J<sub>H,H</sub> = 13Hz, <sup>3</sup>J<sub>H,H</sub> = 7Hz, 1H), 2.69 (ddq, <sup>2</sup>J<sub>H,H</sub> = 13Hz, <sup>3</sup>J<sub>H,H</sub> = 7Hz, <sup>3</sup>J<sub>H,H</sub> = 7Hz, 1H), 2.57 (dd, <sup>2</sup>J<sub>H,H</sub> = 13Hz, <sup>3</sup>J<sub>H,H</sub> = 7Hz, 1H), 2.51 (t, <sup>3</sup>J<sub>H,H</sub> = 7Hz, 2H ), 1.56 (m, 2H), 1.37-1.25 (m, 17H) , 0.87 (<sup>3</sup>J<sub>H,H</sub> = 7Hz, 3H). <sup>13</sup>CNMR (101 MHz, CHCl<sub>3</sub>-d<sub>1</sub>) 181.9, 40.3, 35.2, 32.8, 32.0, 29.7(1), 29.6(8). 29.6(5), 29.4, 29.3, 29.0, 22.8, 16.7, 14.2. HRMS (ESI+): calculated: 261.1883; found: 261.1880.

**5c**, 70%, white solid, <sup>1</sup>H NMR (400 MHz, CHCl<sub>3</sub>-d<sub>1</sub>) 2.85 (dd, <sup>2</sup>J<sub>H,H</sub> = 13Hz, <sup>3</sup>J<sub>H,H</sub> = 7Hz, 1H), 2.70 (ddq, <sup>2</sup>J<sub>H,H</sub> = 13Hz, <sup>3</sup>J<sub>H,H</sub> = 7Hz, <sup>3</sup>J<sub>H,H</sub> = 7Hz, 1H), 2.58 (dd, <sup>2</sup>J<sub>H,H</sub> = 13Hz, <sup>3</sup>J<sub>H,H</sub> = 7Hz, 1H), 2.52 (t, <sup>3</sup>J<sub>H,H</sub> = 7Hz, 2H ), 1.57 (m, 2H), 1.42-1.25 (m, 21H) , 0.88 (<sup>3</sup>J<sub>H,H</sub> = 7Hz, 3H). <sup>13</sup>CNMR (101 MHz, CHCl<sub>3</sub>-d<sub>1</sub>) 181.9, 40.3, 35.2, 32.9, 32.0, 29.7(9), 29.7(7), 29.7(4), 29.7(3), 29.6(6), 29.5, 29.4, 29.0, 22.8, 16.8, 14.3. HRMS (ESI+): calculated: 289.2196; found: 289.2186.

**5d**, 68%, white solid,  $^1\text{H}$  NMR (400 MHz,  $\text{CHCl}_3-d_1$ ) 2.86 (dd,  $^2J_{\text{H,H}} = 13\text{Hz}$ ,  $^3J_{\text{H,H}} = 7\text{Hz}$ , 1H), 2.70 (ddq,  $^2J_{\text{H,H}} = 13\text{Hz}$ ,  $^3J_{\text{H,H}} = 7\text{Hz}$ ,  $^3J_{\text{H,H}} = 7\text{Hz}$ , 1H), 2.58 (dd,  $^2J_{\text{H,H}} = 13\text{Hz}$ ,  $^3J_{\text{H,H}} = 7\text{Hz}$ , 1H), 2.53 (t,  $^3J_{\text{H,H}} = 7\text{Hz}$ , 2H), 1.57 (m, 2H), 1.42-1.25 (m, 25H), 0.88 ( $^3J_{\text{H,H}} = 7\text{Hz}$ , 3H).  $^{13}\text{C}$ NMR (101 MHz,  $\text{CHCl}_3-d_1$ ) 181.9, 40.3, 35.2, 32.8, 32.0, 29.8(2), 29.8(1), 29.7(8), 29.7(3), 29.7(1), 29.6(5), 29.5, 29.0, 22.8, 16.8, 14.2. HRMS (ESI+): calculated: 234.1522; found: 234.1516.

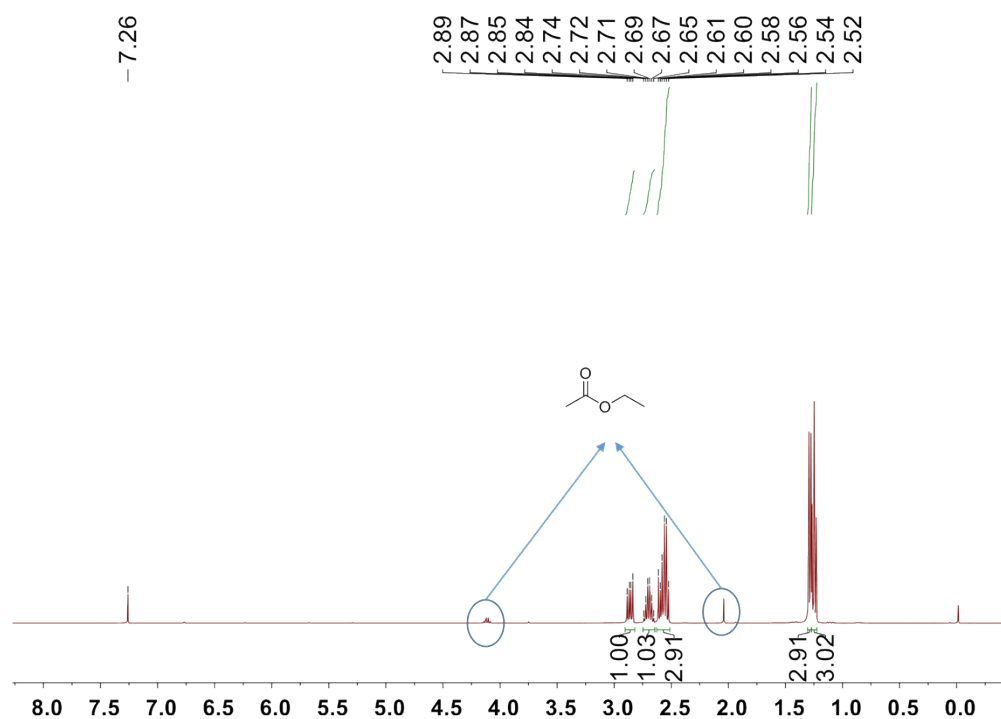

**Fig S30.**  $^1\text{H}$  NMR spectrum of compound **5a** in  $\text{CDCl}_3$ .

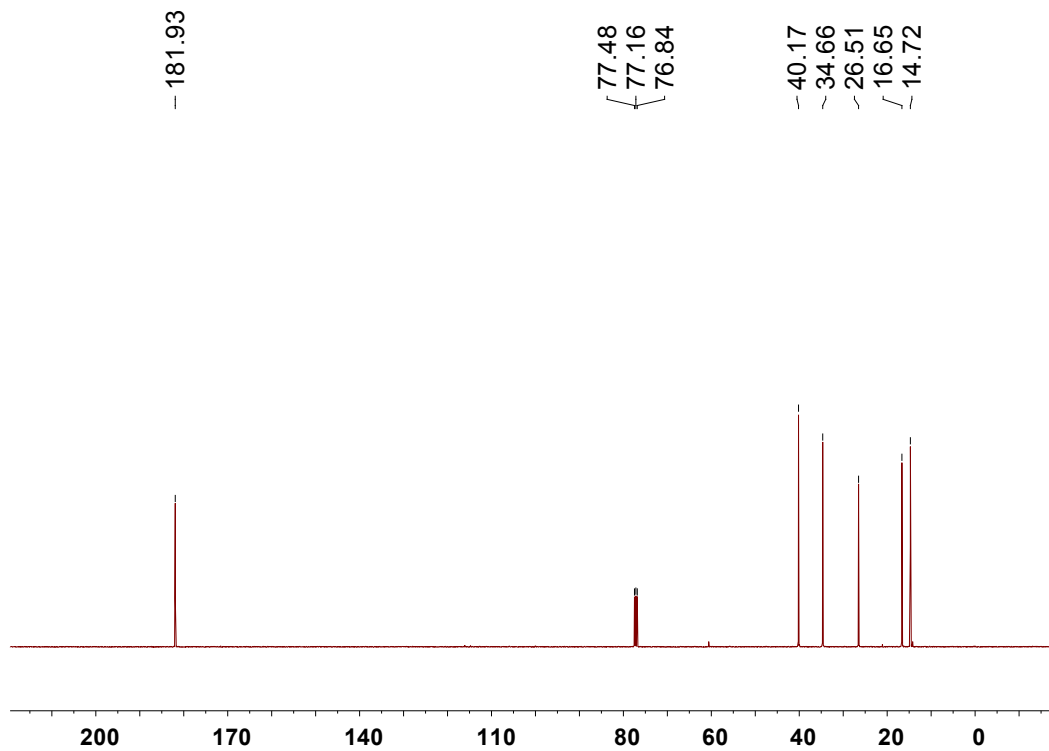

**Fig S31.**  $^{13}\text{C}$  NMR spectrum of compound **5a** in  $\text{CDCl}_3$ .

20210623HESI+2XL-5a #30 RT: 0.42 AV: 1 NL: 5.84E7  
T: FTMS + c ESI Full ms [50.00-800.00]

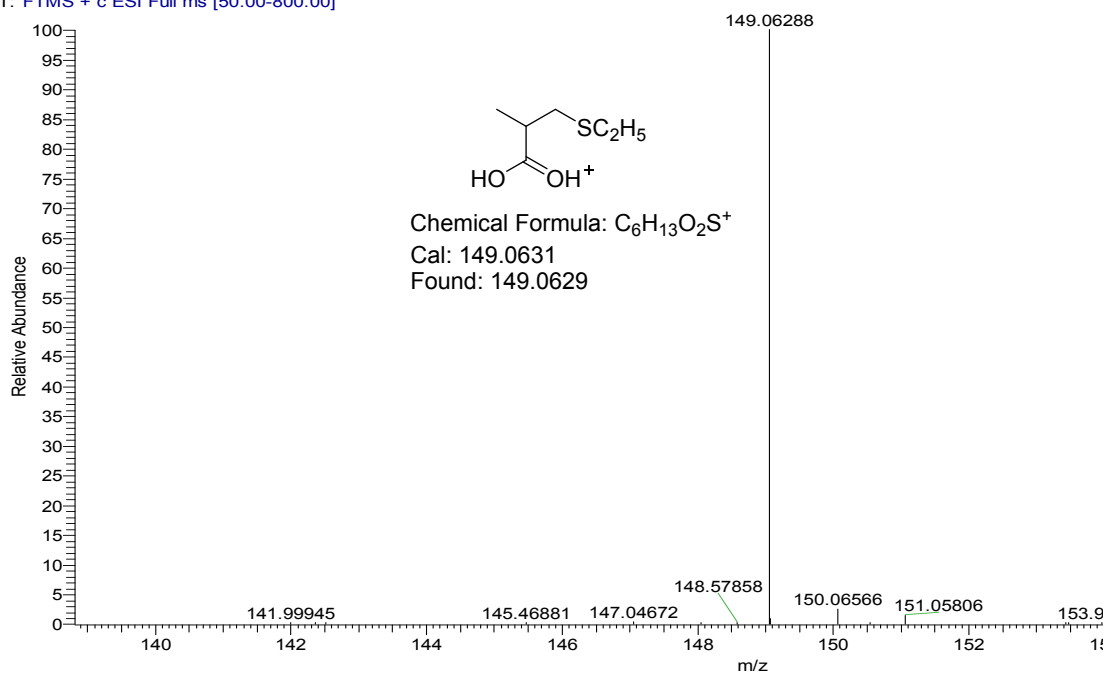

**Fig S32.** ESI mass spectrum of compound **5a**.

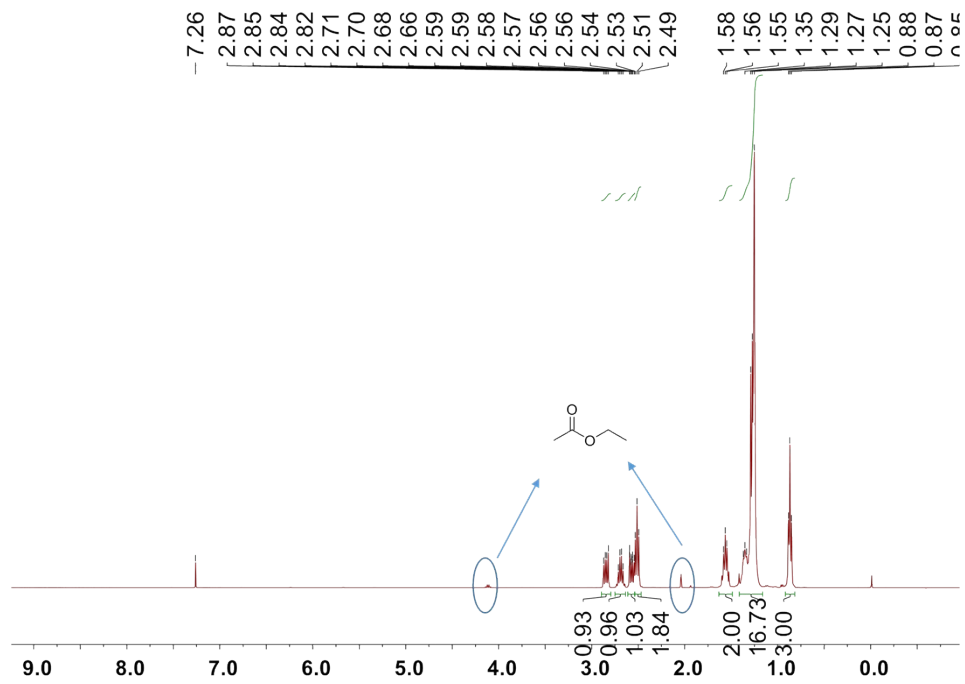

**Fig S33.**  $^1\text{H}$  NMR spectrum of compound **5b** in  $\text{CDCl}_3$ .

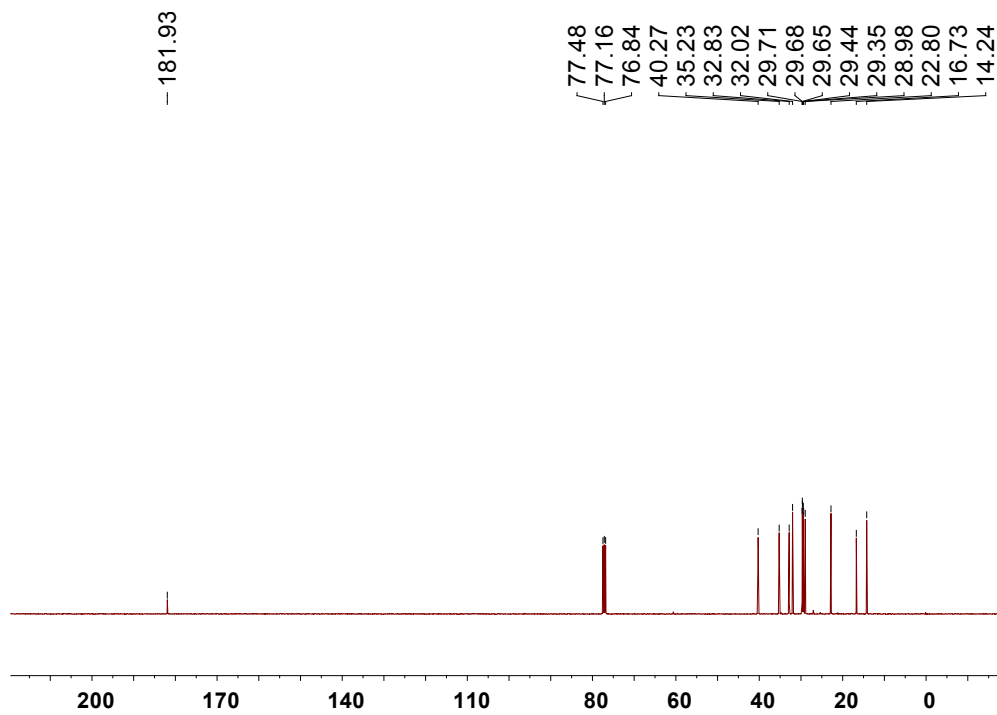

**Fig S34.**  $^{13}\text{C}$  NMR spectrum of compound **5b** in  $\text{CDCl}_3$ .

20210623HESI+2XL-5b #44 RT: 0.62 AV: 1 SB: 1 0.03 NL: 1.96E6  
T: FTMS + c ESI Full ms [50.00-800.00]

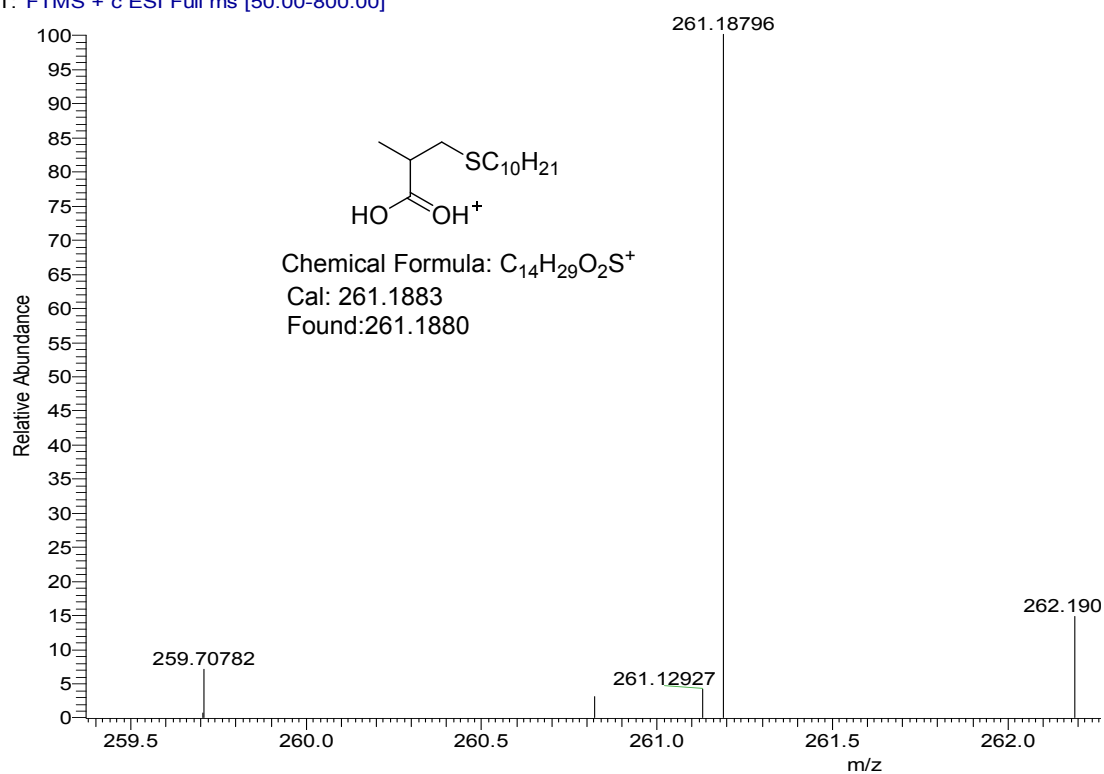

Fig S35. ESI mass spectrum of compound 5b.

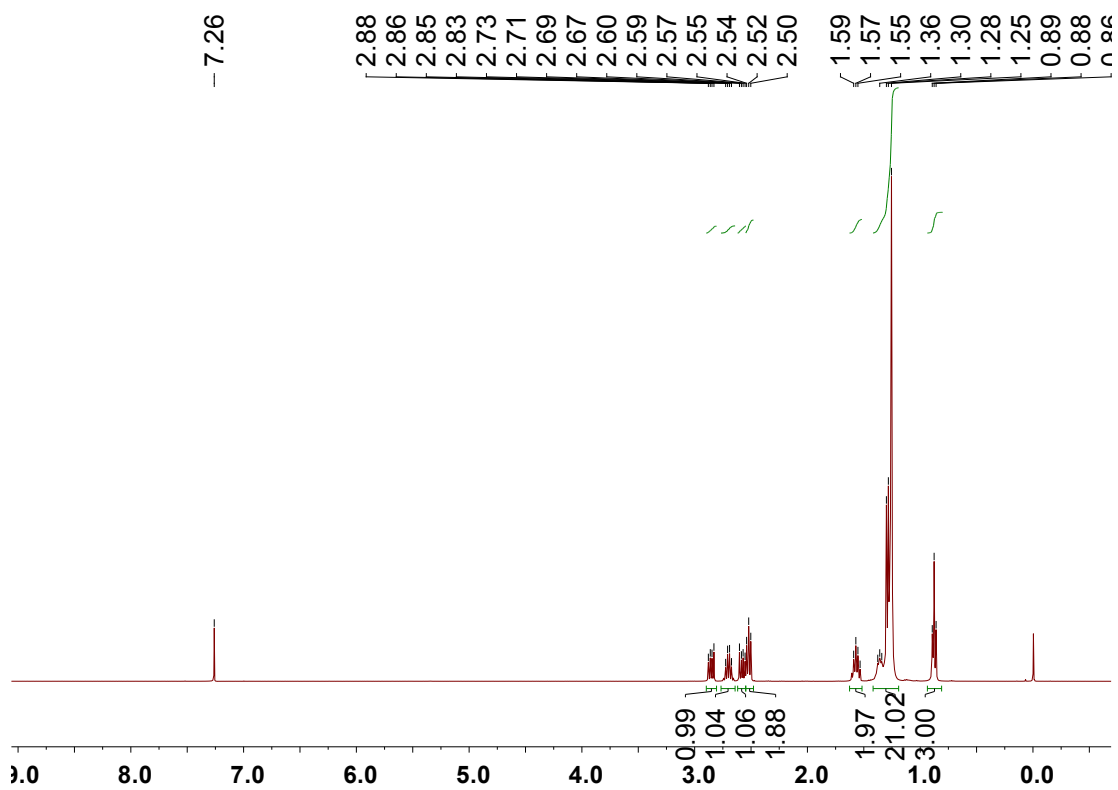

Fig S36.  $^1H$  NMR spectrum of compound 5c in  $CDCl_3$ .

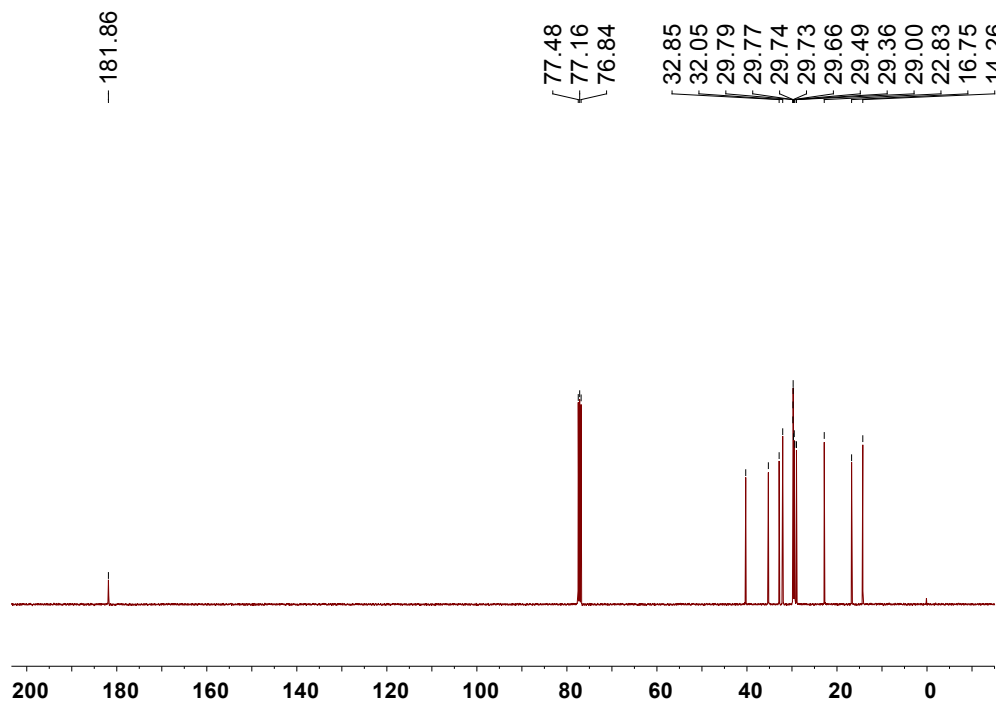

**Fig S37.**  $^{13}\text{C}$  NMR spectrum of compound **5c** in  $\text{CDCl}_3$ .

20210623HESI+2XL-5c #25-27 RT: 0.34-0.37 AV: 3 SB: 1 0.03 NL: 4.85E5  
 T: FTMS + c ESI Full ms [50.00-800.00]

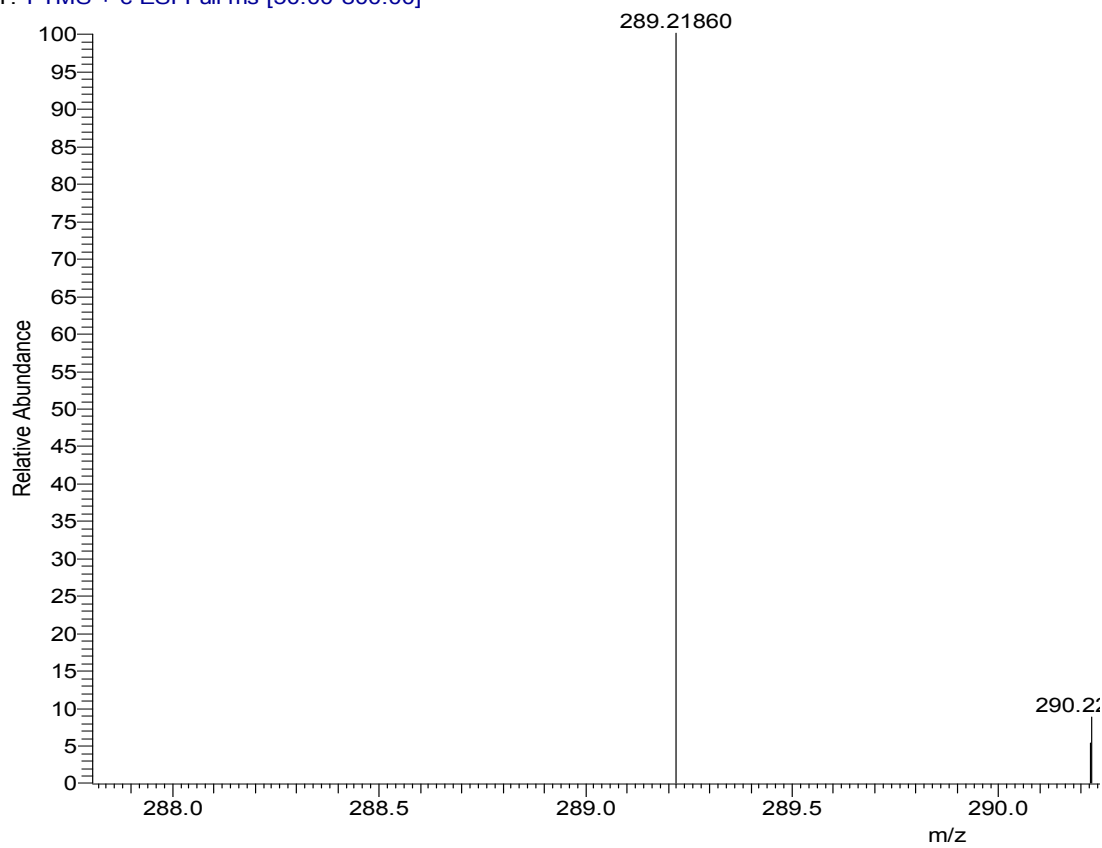

**Fig S38.** ESI mass spectrum of compound **5c**.

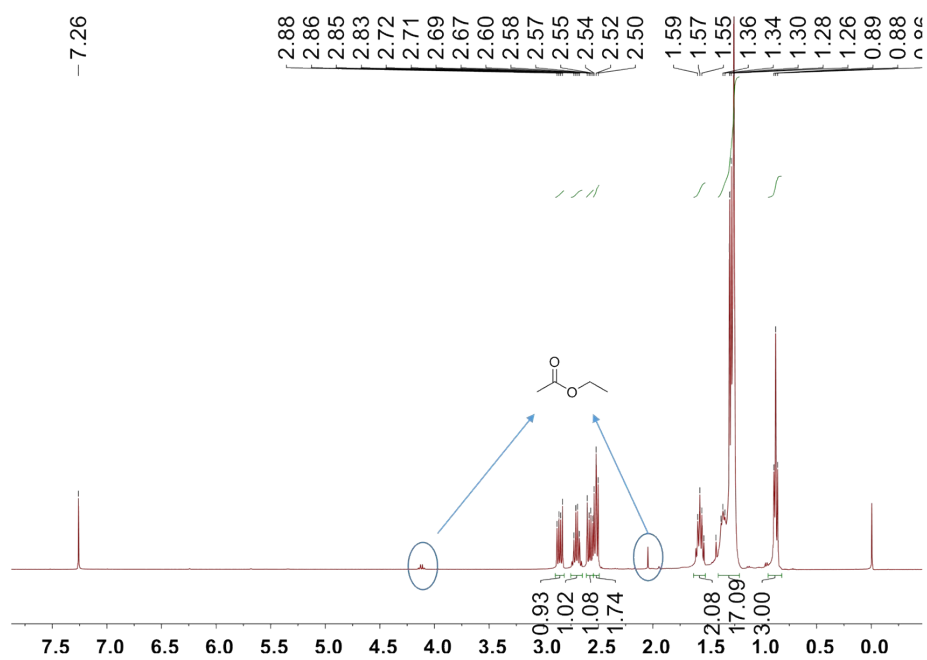

**Fig S39.**  $^1\text{H}$  NMR spectrum of compound **5d** in  $\text{CDCl}_3$ .

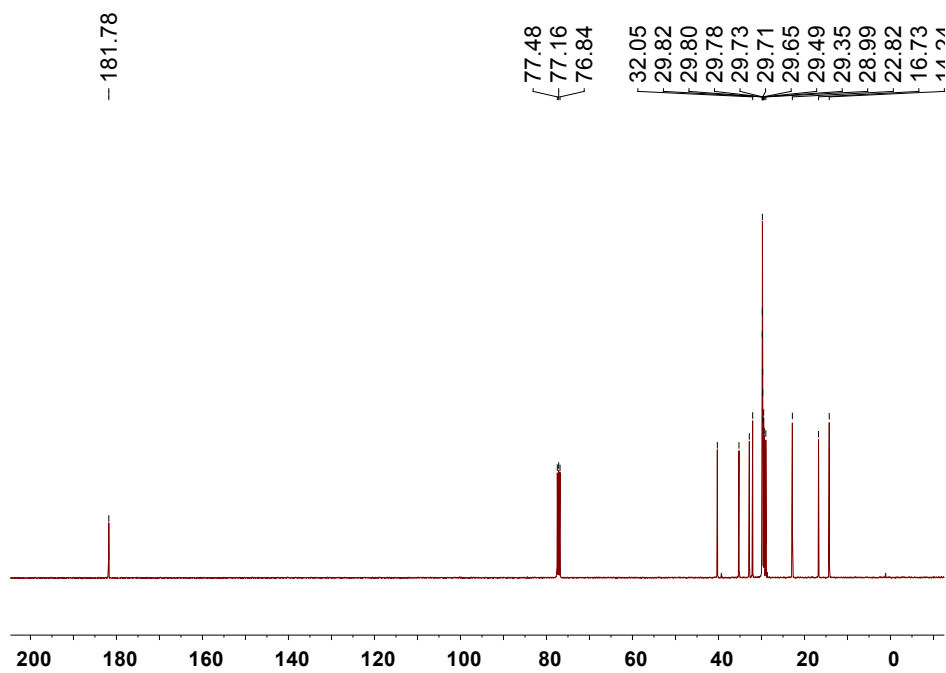

**Fig S40.**  $^{13}\text{C}$  NMR spectrum of compound **5d** in  $\text{CDCl}_3$ .



20210623HESI+2XL-5d #47 RT: 0.66 AV: 1 SB: 1 0.03 NL: 7.70E5  
 F: FTMS + c ESI Full ms [50.00-800.00]

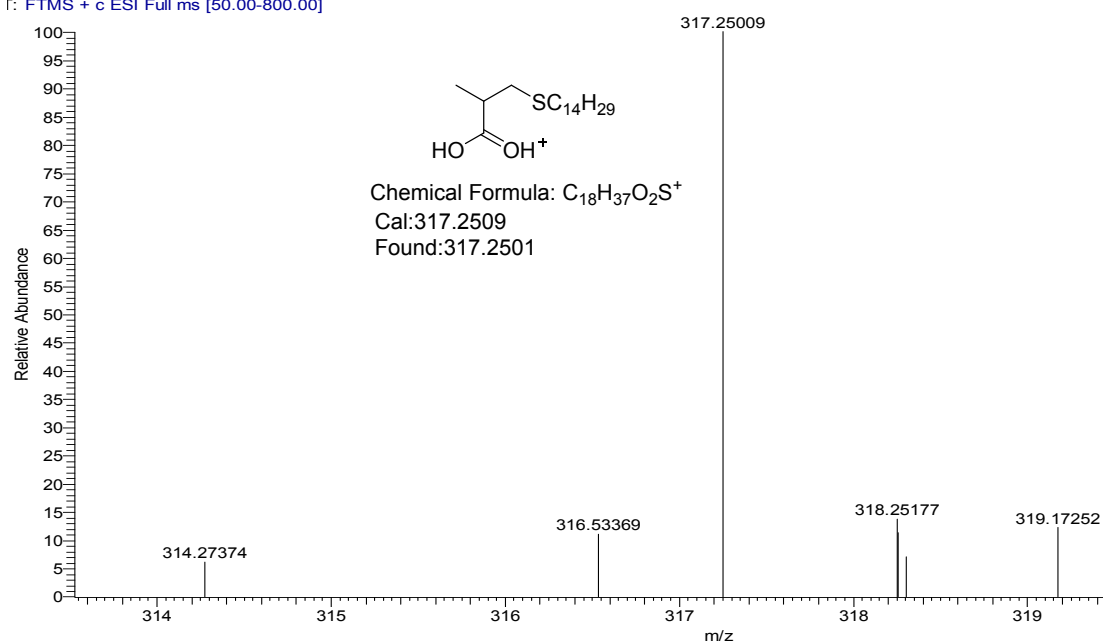

**Fig S41.** ESI mass spectrum of compound **5d**.

**Table S1.** The antimicrobial activities of degradation products **4**, **5a**, **5b**, **5c**, and **5d** against *E. coli*, and *S. aureus*.

| Compound<br>(Concentration)<br>+Time                              | Bacteria         | Sample | Control<br>(CFU/mL) | Treated<br>(CFU/mL) | Reduction<br>Rate (%) |
|-------------------------------------------------------------------|------------------|--------|---------------------|---------------------|-----------------------|
| <b>4 (0.1%) + 5 min</b>                                           | <i>E. Coli</i>   | 1      | $3.4 \times 10^8$   | $2.9 \times 10^8$   | 14.7                  |
|                                                                   |                  | 2      | $2.5 \times 10^8$   | $1.1 \times 10^8$   | 56                    |
|                                                                   | <i>S. aureus</i> | 1      | $6.6 \times 10^7$   | $5.4 \times 10^7$   | 18.2                  |
|                                                                   |                  | 2      | $5.7 \times 10^7$   | $3.2 \times 10^7$   | 43.9                  |
| <b>5a (0.1%) + 5min</b>                                           | <i>E. Coli</i>   | 1      | $1.8 \times 10^8$   | $1.6 \times 10^8$   | 11.1                  |
|                                                                   |                  | 2      | $3.6 \times 10^8$   | $3.5 \times 10^8$   | 2.8                   |
|                                                                   | <i>S. aureus</i> | 1      | $3.3 \times 10^7$   | $2.5 \times 10^7$   | 24.2                  |
|                                                                   |                  | 2      | $3.6 \times 10^7$   | $2.1 \times 10^7$   | 41.7                  |
| <b>5b(0.1%) +<br/>Dodecyl D-<br/>glucoside (0.1%) +<br/>5 min</b> | <i>E. Coli</i>   | 1      | $2.6 \times 10^8$   | $1.4 \times 10^8$   | 46.2                  |
|                                                                   |                  | 2      | $2.3 \times 10^8$   | $1.2 \times 10^8$   | 47.8                  |
|                                                                   | <i>S. aureus</i> | 1      | $6.3 \times 10^7$   | $3.2 \times 10^7$   | 49.2                  |

|                                                                 |   |                |                 |                     |                     |                     |      |
|-----------------------------------------------------------------|---|----------------|-----------------|---------------------|---------------------|---------------------|------|
|                                                                 |   |                | 2               | 4.2x10 <sup>7</sup> | 3.1x10 <sup>7</sup> | 26.2                |      |
| <b>5c(0.1%)<br/>Dodecyl D-<br/>glucoside (0.1%) +<br/>5 min</b> | + | <i>E. Coli</i> | 1               | 1.5x10 <sup>8</sup> | 1.3x10 <sup>8</sup> | 13.3                |      |
|                                                                 |   |                | 2               | 1.8x10 <sup>8</sup> | 1.6x10 <sup>8</sup> | 11.1                |      |
|                                                                 |   |                | <i>S.aureus</i> | 1                   | 5.5x10 <sup>7</sup> | 2.8x10 <sup>7</sup> | 49.1 |
|                                                                 |   |                |                 | 2                   | 7.2x10 <sup>7</sup> | 3.1x10 <sup>7</sup> | 56.9 |
| <b>5d(0.1%)<br/>Dodecyl D-<br/>glucoside (0.1%) +<br/>5min</b>  | + | <i>E. Coli</i> | 1               | 2.3x10 <sup>8</sup> | 1.2x10 <sup>8</sup> | 47.8                |      |
|                                                                 |   |                | 2               | 3.2x10 <sup>8</sup> | 3.1x10 <sup>8</sup> | 3.1                 |      |
|                                                                 |   |                | <i>S.aureus</i> | 1                   | 6.5x10 <sup>7</sup> | 2.9x10 <sup>7</sup> | 55.4 |
|                                                                 |   |                |                 | 2                   | 6.3x10 <sup>7</sup> | 3.1x10 <sup>7</sup> | 50.8 |
| <b>Dodecyl D-<br/>glucoside (0.1%) +<br/>5 min</b>              |   | <i>E. Coli</i> | 1               | 1.9x10 <sup>8</sup> | 1.6x10 <sup>8</sup> | 15.8                |      |
|                                                                 |   |                | 2               | 2.1x10 <sup>8</sup> | 2.0x10 <sup>8</sup> | 4.8                 |      |
|                                                                 |   |                | <i>S.aureus</i> | 1                   | 5.2x10 <sup>7</sup> | 1.6x10 <sup>7</sup> | 69.2 |
|                                                                 |   |                |                 | 2                   | 4.8x10 <sup>7</sup> | 3.9x10 <sup>7</sup> | 18.8 |

**Table S2.** The acute oral toxicity study of compound **3c** in rats.

| Sex           | Dose<br>(mg/kg) | Body Weight (g) |            |            | Death |
|---------------|-----------------|-----------------|------------|------------|-------|
|               |                 | Day 0           | Day 7      | Day 14     |       |
| Male (n =10)  | 5000            | 20.8 ± 1.2      | 20.8 ± 1.2 | 20.8 ± 1.2 | 0     |
| Female(n =10) | 5000            | 20.8 ± 1.2      | 20.8 ± 1.2 | 20.8 ± 1.2 | 0     |

**Reference:**

(1) Farley, A. J. M.; Sandford, C.; Dixon, D. J. *J. Am. Chem. Soc.*, 2015, **137**, 15992-15995.
